# Supplementary material for: New rhenium-tricarbonyl complexes bearing halogen-substituted bidentate ligands: structural, computational and Hirshfeld surfaces studies
Source: Royal Society of Chemistry journal article supplement (doi:10.1039/c8ce01860j), 2018-12-04
Supplement: c8ce01860j1.pdf [file c8ce01860j1.pdf]

**Supplementary Materials:**

**New rhenium-tricarbonyl complexes bearing halogen-substituted bidentate ligands: Structural, computational and Hirshfeld surfaces studies**

Reza Kia,<sup>1,\*</sup>, Soheil Mahmudi<sup>1</sup> and Paul R. Raithby<sup>2</sup>

- 1) *Chemistry Department, Sharif University of Technology, P.O. Box 11155-3516, Tehran, Iran*
- 2) *Department of Chemistry, University of Bath, Claverton Down, Bath, BA2 7AY, UK*

---

\* E-mail: [rkia@sharif.edu](mailto:rkia@sharif.edu), [zsrkk@yahoo.com](mailto:zsrkk@yahoo.com); Tel.: +98-21-66165332

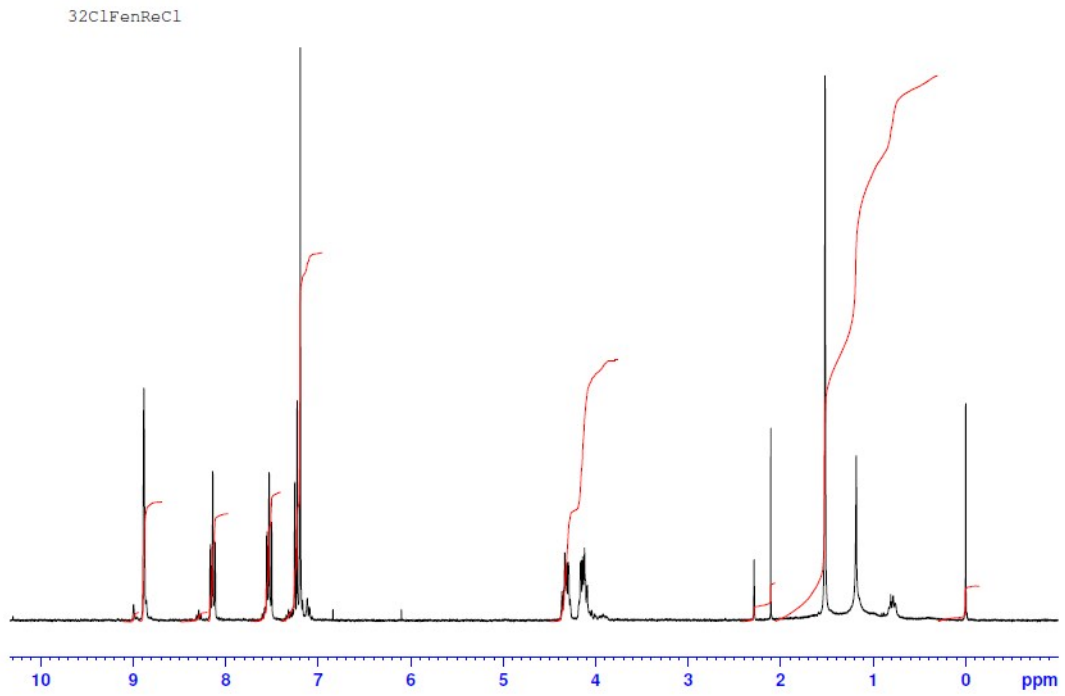

**Fig. S1.** <sup>1</sup>H-NMR spectrum of **C2** in CDCl<sub>3</sub>.

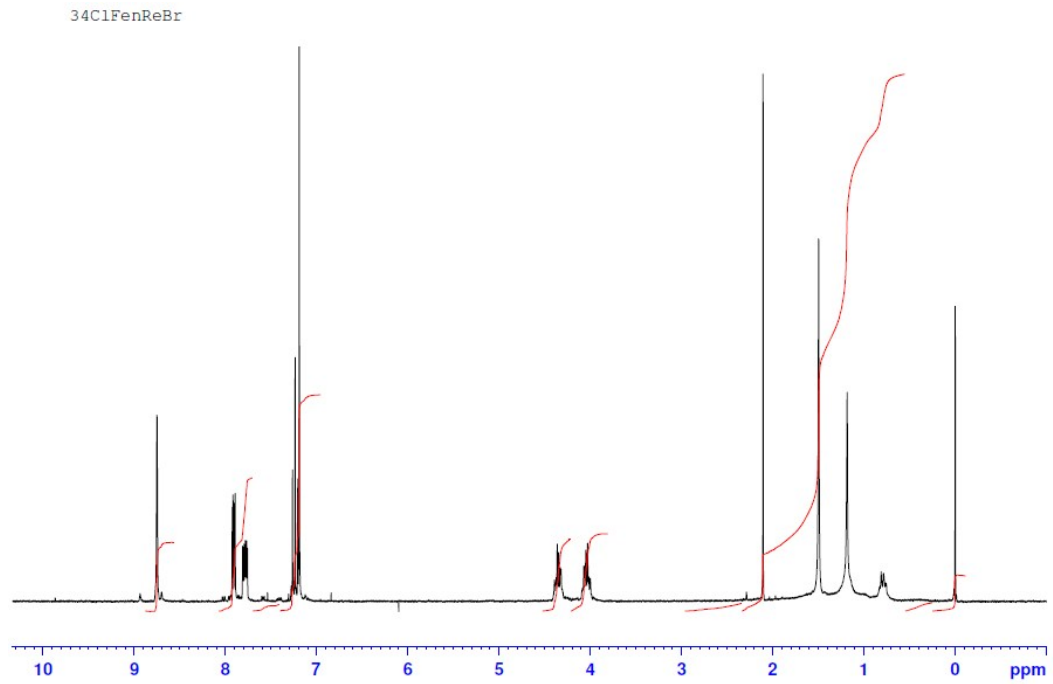

**Fig. S2.** <sup>1</sup>H-NMR spectrum of **C3** in CDCl<sub>3</sub>.

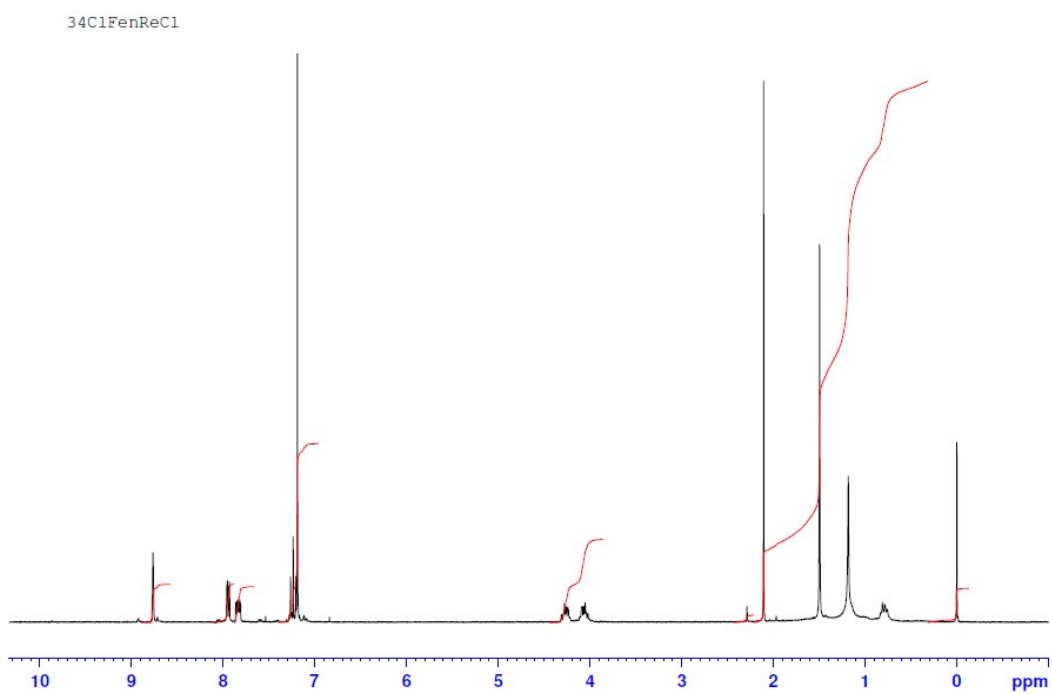

**Fig. S3.** <sup>1</sup>H-NMR spectrum of **C4** in CDCl<sub>3</sub>.

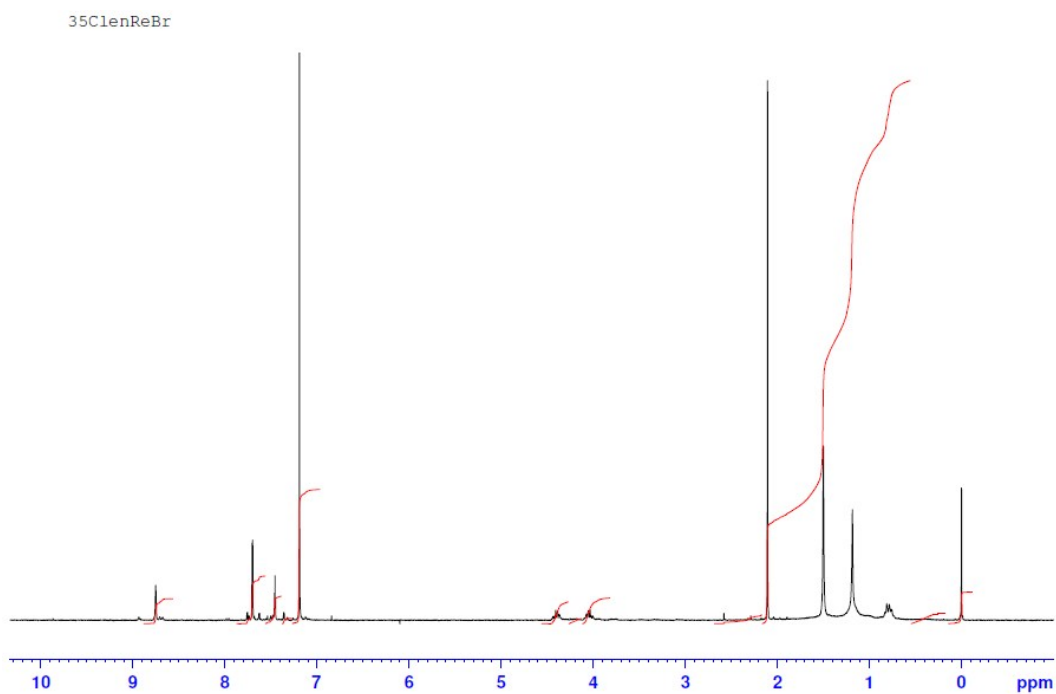

**Fig. S4.** <sup>1</sup>H-NMR spectrum of **C5** in CDCl<sub>3</sub>.

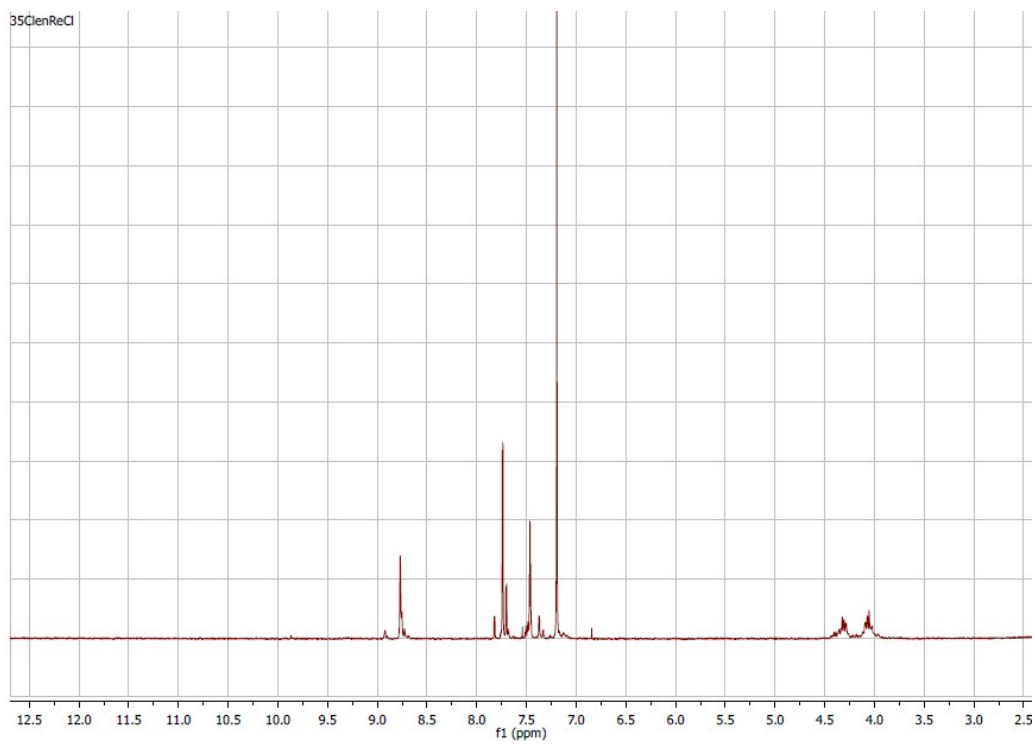

**Fig. S5.**  $^1\text{H-NMR}$  spectrum of **C6** in  $\text{CDCl}_3$ .

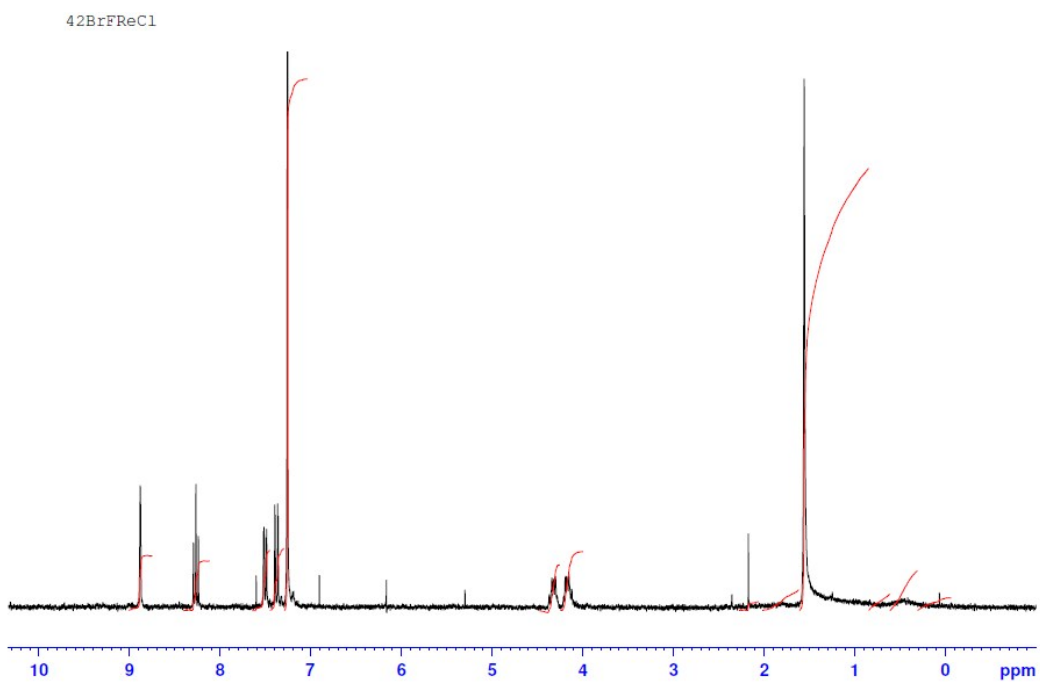

**Fig. S6.**  $^1\text{H-NMR}$  spectrum of **C7** in  $\text{CDCl}_3$ .

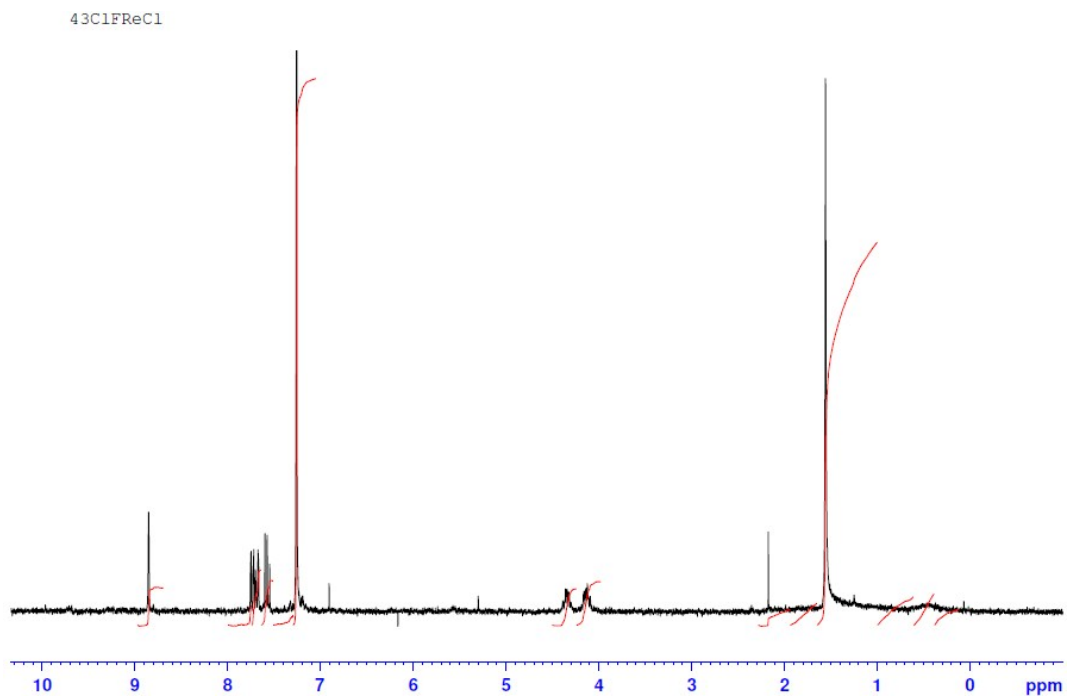

**Fig. S7.**  $^1\text{H}$ -NMR spectrum of **C8** in  $\text{CDCl}_3$ .

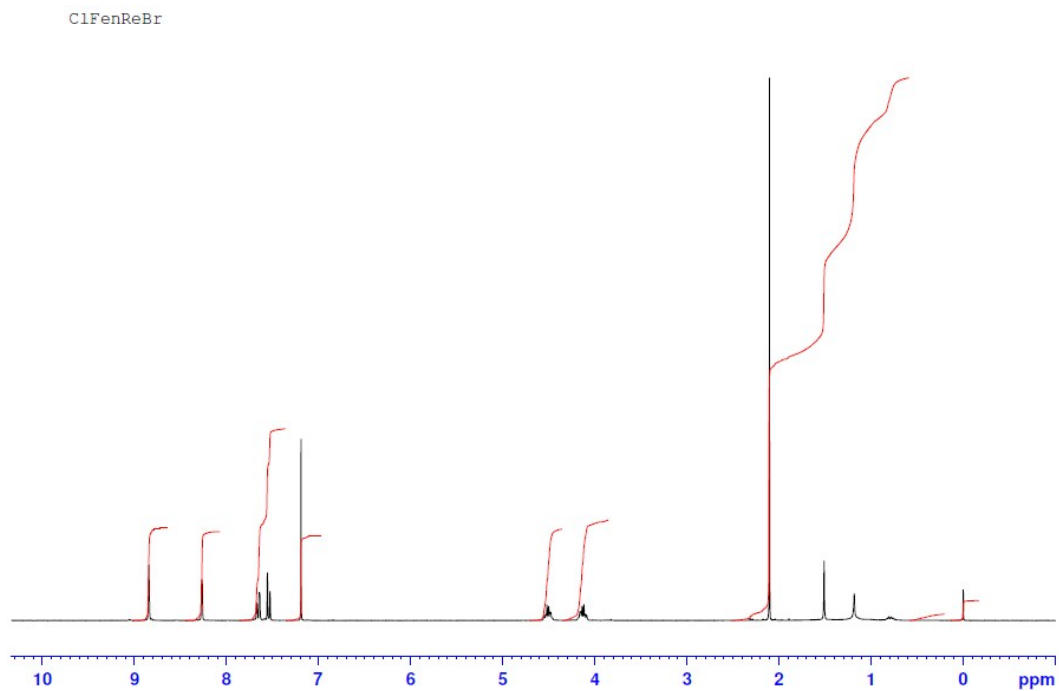

**Fig. S8.**  $^1\text{H}$ -NMR spectrum of **C9** in  $\text{CDCl}_3$ .

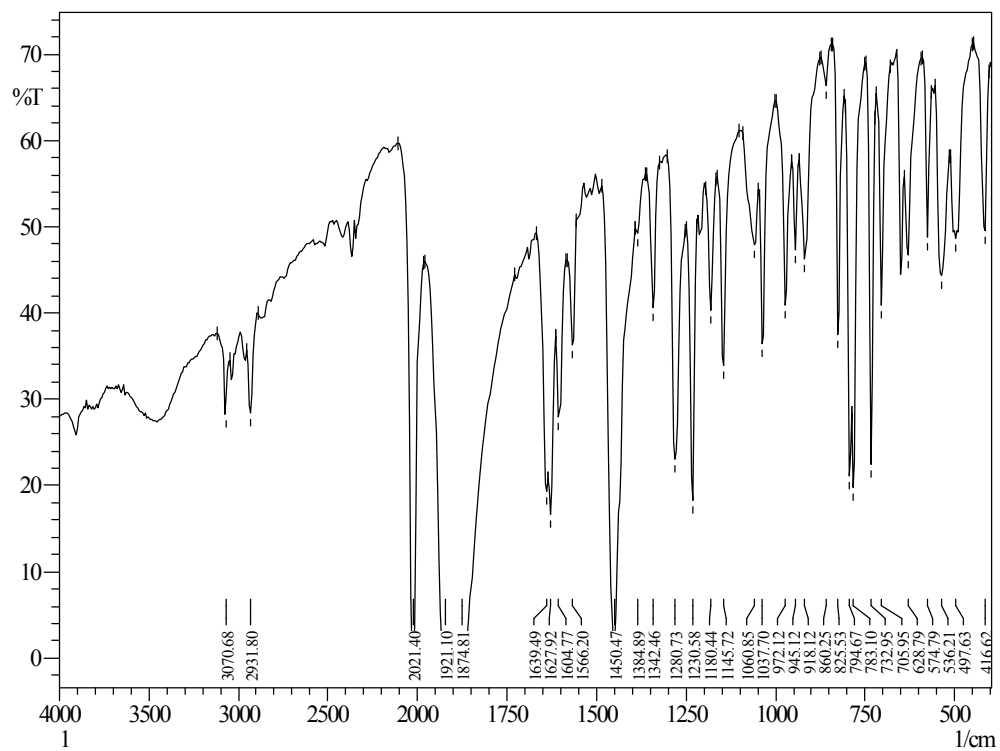

**Fig. S9.** FT-IR spectrum of 32ClFenReCl (C2).

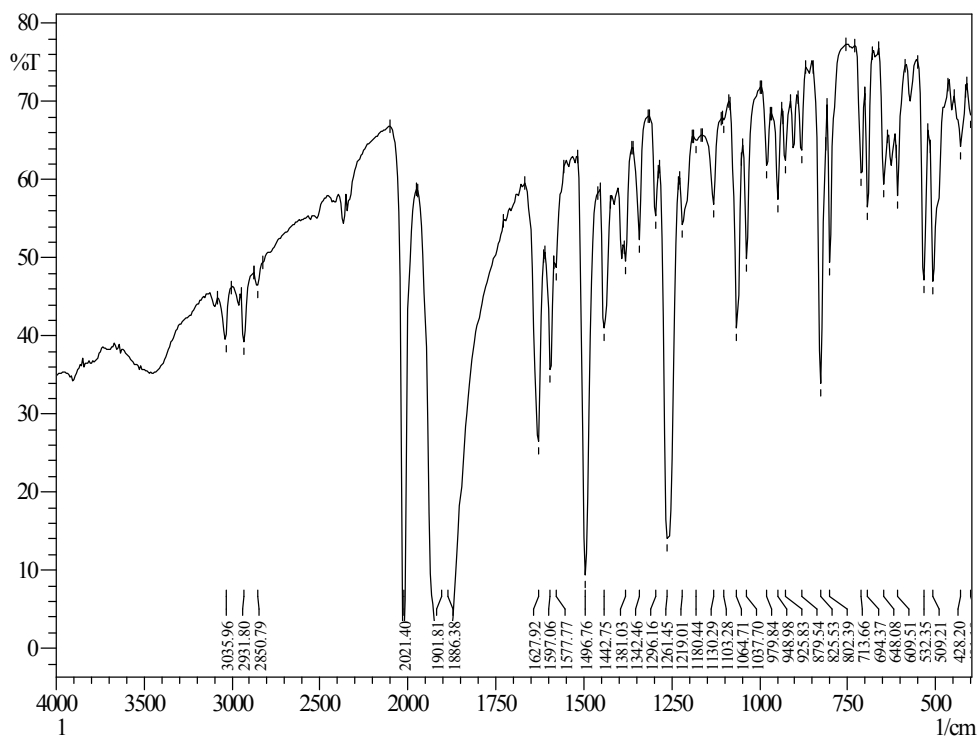

**Fig. S10.** FT-IR spectrum of 34ClFenReBr (C3).

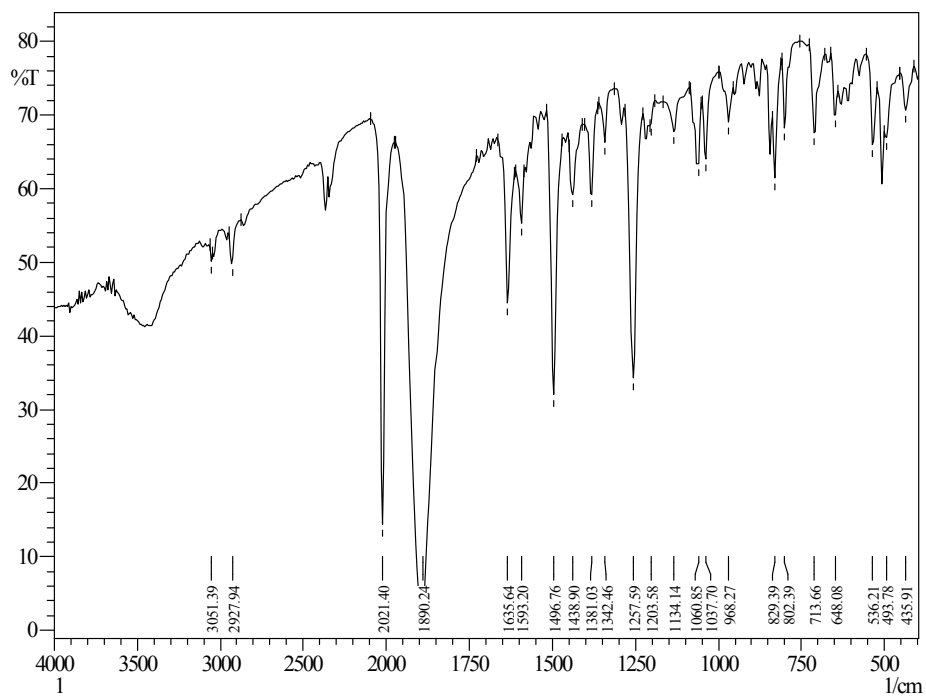

**Fig. S11.** FT-IR spectrum of 34ClFenReCl (C4).

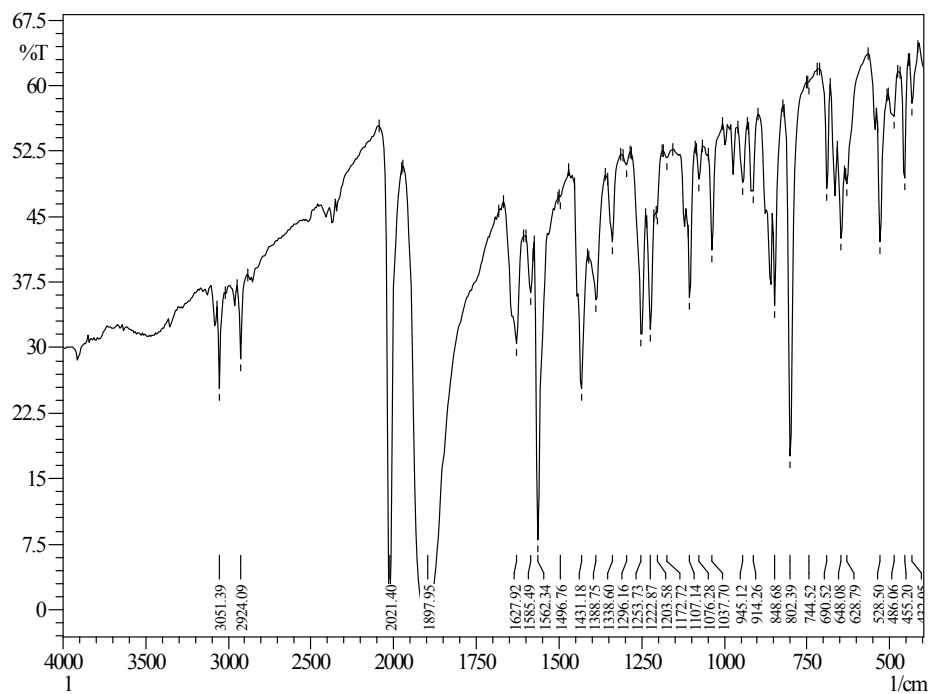

**Fig. S12.** FT-IR spectrum of 35ClenReBr (C5).

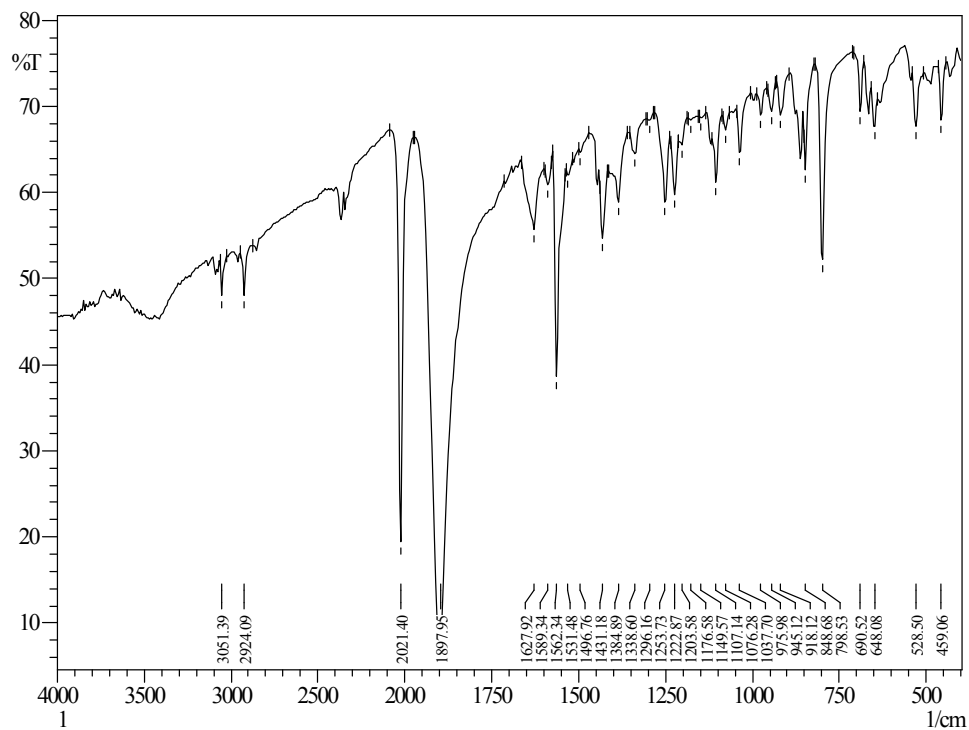

**Fig. S13.** FT-IR spectrum of 35ClenReCl (C6).

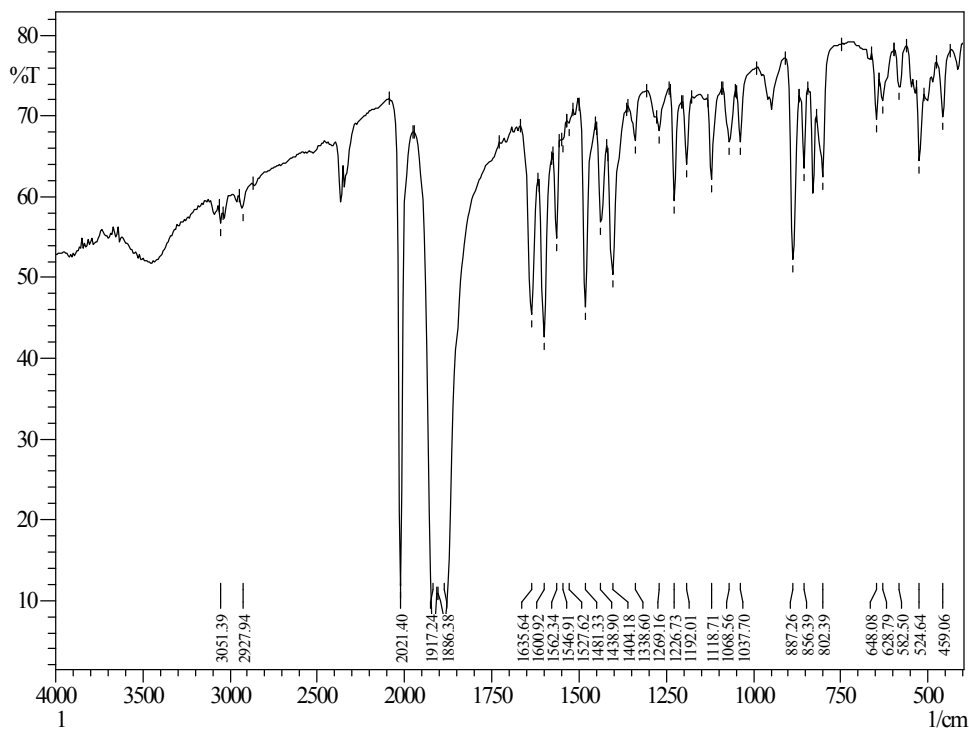

**Fig. S14.** FT-IR spectrum of 42BrFReCl (C7).



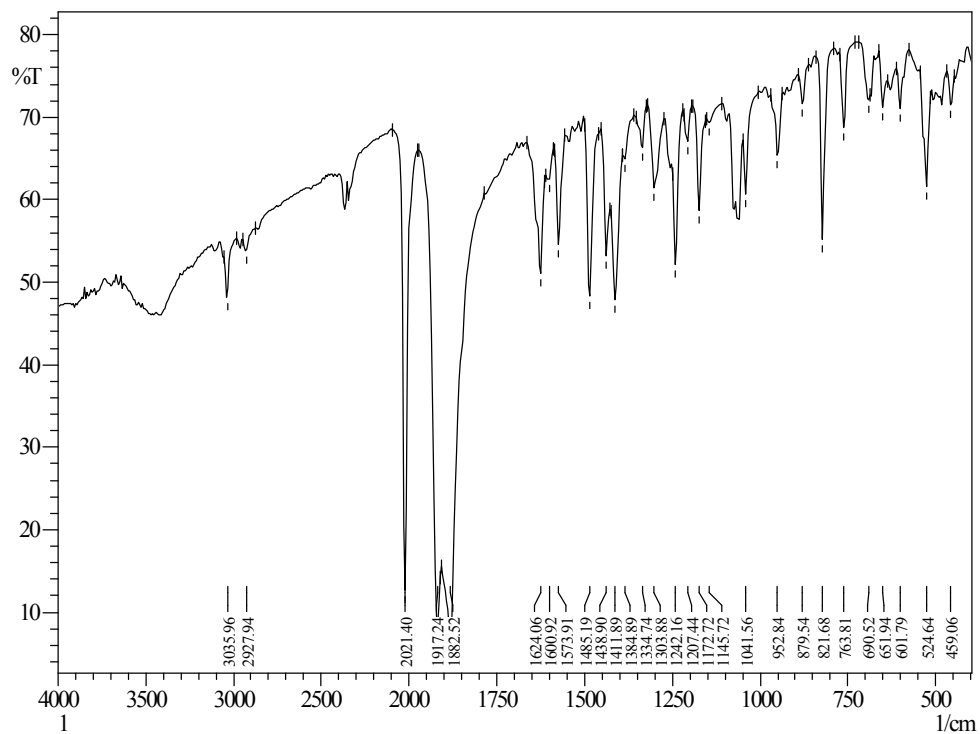

**Fig. S15.** FT-IR spectrum of **43ClFReCl (C8)**.

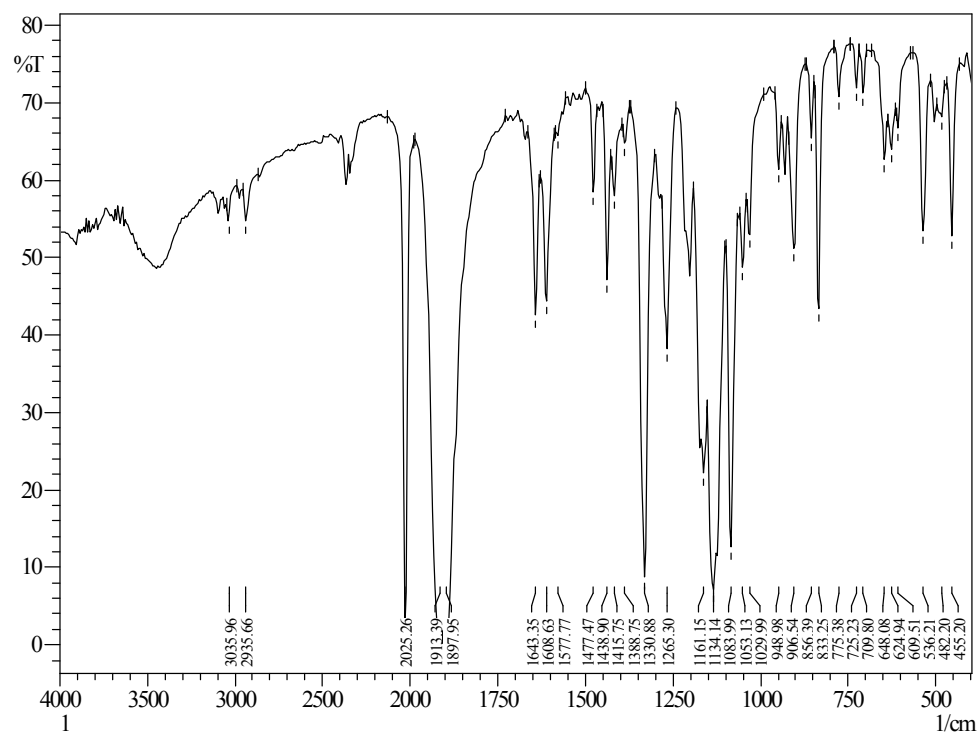

**Fig. S16.** FT-IR spectrum of **ClFenReBr (C9)**.

**Table S1. Crystal data and structure refinement for C2 = 32ClFReCl**

|                                   |                                             |                              |
|-----------------------------------|---------------------------------------------|------------------------------|
| Identification code               | <b>C2</b>                                   |                              |
| Empirical formula                 | C19 H12 Cl3 F2 N2 O3 Re                     |                              |
| Formula weight                    | 646.86                                      |                              |
| Temperature                       | 150(2) K                                    |                              |
| Wavelength                        | 0.71073 Å                                   |                              |
| Crystal system                    | Triclinic                                   |                              |
| Space group                       | <i>P</i> -1                                 |                              |
| Unit cell dimensions              | $a = 7.1480(2)$ Å                           | $\alpha = 105.7160(9)^\circ$ |
|                                   | $b = 9.2830(2)$ Å                           | $\beta = 98.7670(10)^\circ$  |
|                                   | $c = 17.0670(6)$ Å                          | $\gamma = 95.9490(14)^\circ$ |
| Volume                            | 1064.83(5) Å <sup>3</sup>                   |                              |
| Z                                 | 2                                           |                              |
| Density (calculated)              | 2.017 Mg/m <sup>3</sup>                     |                              |
| Absorption coefficient            | 6.123 mm <sup>-1</sup>                      |                              |
| F(000)                            | 616                                         |                              |
| Crystal size                      | 0.060 x 0.050 x 0.010 mm <sup>3</sup>       |                              |
| Theta range for data collection   | 2.917 to 27.502°                            |                              |
| Index ranges                      | -9 ≤ h ≤ 9, -12 ≤ k ≤ 12, -22 ≤ l ≤ 22      |                              |
| Reflections collected             | 15268                                       |                              |
| Independent reflections           | 4817 [R(int) = 0.0728]                      |                              |
| Completeness to theta = 25.242°   | 99.4 %                                      |                              |
| Refinement method                 | Full-matrix least-squares on F <sup>2</sup> |                              |
| Data / restraints / parameters    | 4817 / 0 / 271                              |                              |
| Goodness-of-fit on F <sup>2</sup> | 1.064                                       |                              |
| Final R indices [I > 2σ(I)]       | R1 = 0.0382, wR2 = 0.0913                   |                              |
| R indices (all data)              | R1 = 0.0456, wR2 = 0.0957                   |                              |
| Largest diff. peak and hole       | 1.992 and -3.339 e.Å <sup>-3</sup>          |                              |

**Table S2. Crystal data and structure refinement for C3 = 34clfrebr**

|                                   |                                             |                               |
|-----------------------------------|---------------------------------------------|-------------------------------|
| Identification code               | <b>C3</b>                                   |                               |
| Empirical formula                 | C19 H12 Br Cl2 F2 N2 O3 Re                  |                               |
| Formula weight                    | 691.32                                      |                               |
| Temperature                       | 150(2) K                                    |                               |
| Wavelength                        | 0.71073 Å                                   |                               |
| Crystal system                    | Triclinic                                   |                               |
| Space group                       | <i>P</i> -1                                 |                               |
| Unit cell dimensions              | $a = 7.36000(10) \text{ \AA}$               | $\alpha = 101.5080(10)^\circ$ |
|                                   | $b = 9.2080(3) \text{ \AA}$                 | $\beta = 94.970(2)^\circ$     |
|                                   | $c = 16.5900(5) \text{ \AA}$                | $\gamma = 98.653(2)^\circ$    |
| Volume                            | 1081.25(5) Å <sup>3</sup>                   |                               |
| Z                                 | 2                                           |                               |
| Density (calculated)              | 2.123 Mg/m <sup>3</sup>                     |                               |
| Absorption coefficient            | 7.754 mm <sup>-1</sup>                      |                               |
| F(000)                            | 652                                         |                               |
| Crystal size                      | 0.200 x 0.050 x 0.050 mm <sup>3</sup>       |                               |
| Theta range for data collection   | 2.948 to 27.483°                            |                               |
| Index ranges                      | -9 ≤ h ≤ 9, -11 ≤ k ≤ 11, -21 ≤ l ≤ 21      |                               |
| Reflections collected             | 15821                                       |                               |
| Independent reflections           | 4940 [R(int) = 0.0512]                      |                               |
| Completeness to theta = 25.242°   | 99.8 %                                      |                               |
| Refinement method                 | Full-matrix least-squares on F <sup>2</sup> |                               |
| Data / restraints / parameters    | 4940 / 0 / 271                              |                               |
| Goodness-of-fit on F <sup>2</sup> | 1.279                                       |                               |
| Final R indices [I > 2σ(I)]       | R1 = 0.0272, wR2 = 0.0783                   |                               |
| R indices (all data)              | R1 = 0.0339, wR2 = 0.0988                   |                               |
| Largest diff. peak and hole       | 1.511 and -2.575 e.Å <sup>-3</sup>          |                               |

**Table S3. Crystal data and structure refinement for C4 = 34clfrecl.**

|                                   |                                                             |                              |
|-----------------------------------|-------------------------------------------------------------|------------------------------|
| Identification code               | C4                                                          |                              |
| Empirical formula                 | C19 H12 Cl3 F2 N2 O3 Re                                     |                              |
| Formula weight                    | 646.86                                                      |                              |
| Temperature                       | 150(2) K                                                    |                              |
| Wavelength                        | 0.71073 Å                                                   |                              |
| Crystal system                    | Monoclinic                                                  |                              |
| Space group                       | <i>P</i> 2 <sub>1</sub> / <i>c</i>                          |                              |
| Unit cell dimensions              | <i>a</i> = 15.4530(5) Å                                     | $\alpha = 90^\circ$          |
|                                   | <i>b</i> = 7.0730(2) Å                                      | $\beta = 126.1351(11)^\circ$ |
|                                   | <i>c</i> = 23.5290(8) Å                                     | $\gamma = 90^\circ$          |
| Volume                            | 2076.98(12) Å <sup>3</sup>                                  |                              |
| Z                                 | 4                                                           |                              |
| Density (calculated)              | 2.069 Mg/m <sup>3</sup>                                     |                              |
| Absorption coefficient            | 6.278 mm <sup>-1</sup>                                      |                              |
| F(000)                            | 1232                                                        |                              |
| Crystal size                      | 0.090 x 0.040 x 0.010 mm <sup>3</sup>                       |                              |
| Theta range for data collection   | 3.073 to 27.519°                                            |                              |
| Index ranges                      | -20 ≤ <i>h</i> ≤ 17, -9 ≤ <i>k</i> ≤ 8, -30 ≤ <i>l</i> ≤ 26 |                              |
| Reflections collected             | 9932                                                        |                              |
| Independent reflections           | 4688 [R(int) = 0.0633]                                      |                              |
| Completeness to theta = 25.242°   | 99.4 %                                                      |                              |
| Refinement method                 | Full-matrix least-squares on F <sup>2</sup>                 |                              |
| Data / restraints / parameters    | 4688 / 0 / 271                                              |                              |
| Goodness-of-fit on F <sup>2</sup> | 1.030                                                       |                              |
| Final R indices [I > 2σ(I)]       | R1 = 0.0435, wR2 = 0.0957                                   |                              |
| R indices (all data)              | R1 = 0.0671, wR2 = 0.1081                                   |                              |
| Largest diff. peak and hole       | 1.990 and -3.422 e.Å <sup>-3</sup>                          |                              |

**Table S4. Crystal data and structure refinement for C5 = 35clenbr**

|                                   |                                             |                            |
|-----------------------------------|---------------------------------------------|----------------------------|
| Identification code               | <b>C5</b>                                   |                            |
| Empirical formula                 | C19 H12 Br Cl4 N2 O3 Re                     |                            |
| Formula weight                    | 724.22                                      |                            |
| Temperature                       | 150(2) K                                    |                            |
| Wavelength                        | 0.71073 Å                                   |                            |
| Crystal system                    | Triclinic                                   |                            |
| Space group                       | <i>P</i> -1                                 |                            |
| Unit cell dimensions              | $a = 7.1653(3) \text{ \AA}$                 | $\alpha = 86.971(4)^\circ$ |
|                                   | $b = 10.1441(5) \text{ \AA}$                | $\beta = 82.270(4)^\circ$  |
|                                   | $c = 16.1968(10) \text{ \AA}$               | $\gamma = 71.257(4)^\circ$ |
| Volume                            | 1104.65(10) Å <sup>3</sup>                  |                            |
| Z                                 | 2                                           |                            |
| Density (calculated)              | 2.177 Mg/m <sup>3</sup>                     |                            |
| Absorption coefficient            | 7.817 mm <sup>-1</sup>                      |                            |
| F(000)                            | 684                                         |                            |
| Crystal size                      | 0.080 x 0.040 x 0.020 mm <sup>3</sup>       |                            |
| Theta range for data collection   | 3.424 to 29.262°                            |                            |
| Index ranges                      | -8<=h<=9, -12<=k<=13, -21<=l<=22            |                            |
| Reflections collected             | 9299                                        |                            |
| Independent reflections           | 5040 [R(int) = 0.0394]                      |                            |
| Completeness to theta = 25.242°   | 99.7 %                                      |                            |
| Refinement method                 | Full-matrix least-squares on F <sup>2</sup> |                            |
| Data / restraints / parameters    | 5040 / 0 / 271                              |                            |
| Goodness-of-fit on F <sup>2</sup> | 1.031                                       |                            |
| Final R indices [I>2sigma(I)]     | R1 = 0.0353, wR2 = 0.0691                   |                            |
| R indices (all data)              | R1 = 0.0410, wR2 = 0.0722                   |                            |
| Largest diff. peak and hole       | 1.334 and -1.758 e.Å <sup>-3</sup>          |                            |

**Table S5. Crystal data and structure refinement for C6 = 35clencl**

|                                   |                                                             |                            |
|-----------------------------------|-------------------------------------------------------------|----------------------------|
| Identification code               | <b>C6</b>                                                   |                            |
| Empirical formula                 | C19 H12 Cl5 N2 O3 Re                                        |                            |
| Formula weight                    | 679.76                                                      |                            |
| Temperature                       | 150(2) K                                                    |                            |
| Wavelength                        | 0.71073 Å                                                   |                            |
| Crystal system                    | Monoclinic                                                  |                            |
| Space group                       | <i>P</i> 2 <sub>1</sub> / <i>c</i>                          |                            |
| Unit cell dimensions              | <i>a</i> = 7.12100(10) Å                                    | $\alpha = 90^\circ$        |
|                                   | <i>b</i> = 33.7880(7) Å                                     | $\beta = 96.0240(8)^\circ$ |
|                                   | <i>c</i> = 9.4780(2) Å                                      | $\gamma = 90^\circ$        |
| Volume                            | 2267.86(7) Å <sup>3</sup>                                   |                            |
| Z                                 | 4                                                           |                            |
| Density (calculated)              | 1.991 Mg/m <sup>3</sup>                                     |                            |
| Absorption coefficient            | 5.971 mm <sup>-1</sup>                                      |                            |
| F(000)                            | 1296                                                        |                            |
| Crystal size                      | 0.060 x 0.030 x 0.020 mm <sup>3</sup>                       |                            |
| Theta range for data collection   | 2.939 to 27.475°                                            |                            |
| Index ranges                      | -8 ≤ <i>h</i> ≤ 9, -43 ≤ <i>k</i> ≤ 27, -12 ≤ <i>l</i> ≤ 12 |                            |
| Reflections collected             | 13899                                                       |                            |
| Independent reflections           | 5136 [R(int) = 0.0561]                                      |                            |
| Completeness to theta = 25.242°   | 99.3 %                                                      |                            |
| Refinement method                 | Full-matrix least-squares on F <sup>2</sup>                 |                            |
| Data / restraints / parameters    | 5136 / 0 / 271                                              |                            |
| Goodness-of-fit on F <sup>2</sup> | 1.035                                                       |                            |
| Final R indices [I > 2σ(I)]       | R1 = 0.0339, wR2 = 0.0559                                   |                            |
| R indices (all data)              | R1 = 0.0642, wR2 = 0.0655                                   |                            |
| Largest diff. peak and hole       | 1.650 and -1.628 e.Å <sup>-3</sup>                          |                            |

**Table S6. Crystal data and structure refinement for C7 = 42BrFReCl**

|                                   |                                             |                             |
|-----------------------------------|---------------------------------------------|-----------------------------|
| Identification code               | C7                                          |                             |
| Empirical formula                 | C19 H12 Br2 Cl F2 N2 O3 Re                  |                             |
| Formula weight                    | 735.78                                      |                             |
| Temperature                       | 150(2) K                                    |                             |
| Wavelength                        | 0.71073 Å                                   |                             |
| Crystal system                    | Triclinic                                   |                             |
| Space group                       | <i>P</i> -1                                 |                             |
| Unit cell dimensions              | $a = 7.3756(4)$ Å                           | $\alpha = 98.004(4)^\circ$  |
|                                   | $b = 8.8914(4)$ Å                           | $\beta = 90.442(5)^\circ$   |
|                                   | $c = 16.9636(10)$ Å                         | $\gamma = 105.113(4)^\circ$ |
| Volume                            | 1062.40(10) Å <sup>3</sup>                  |                             |
| Z                                 | 2                                           |                             |
| Density (calculated)              | 2.300 Mg/m <sup>3</sup>                     |                             |
| Absorption coefficient            | 9.647 mm <sup>-1</sup>                      |                             |
| F(000)                            | 688                                         |                             |
| Crystal size                      | 0.100 x 0.060 x 0.020 mm <sup>3</sup>       |                             |
| Theta range for data collection   | 3.357 to 27.500°                            |                             |
| Index ranges                      | -9 ≤ h ≤ 9, -11 ≤ k ≤ 11, -22 ≤ l ≤ 22      |                             |
| Reflections collected             | 15534                                       |                             |
| Independent reflections           | 4862 [R(int) = 0.0526]                      |                             |
| Completeness to theta = 25.242°   | 99.7 %                                      |                             |
| Refinement method                 | Full-matrix least-squares on F <sup>2</sup> |                             |
| Data / restraints / parameters    | 4862 / 0 / 281                              |                             |
| Goodness-of-fit on F <sup>2</sup> | 1.023                                       |                             |
| Final R indices [I > 2σ(I)]       | R1 = 0.0527, wR2 = 0.1244                   |                             |
| R indices (all data)              | R1 = 0.0727, wR2 = 0.1355                   |                             |
| Largest diff. peak and hole       | 3.252 and -1.709 e.Å <sup>-3</sup>          |                             |

**Table S7. Crystal data and structure refinement for C8 = 43ClFReCl**

|                                   |                                             |                        |
|-----------------------------------|---------------------------------------------|------------------------|
| Identification code               | <b>C8</b>                                   |                        |
| Empirical formula                 | C38 H24 Cl6 F4 N4 O6 Re2                    |                        |
| Formula weight                    | 1293.71                                     |                        |
| Temperature                       | 150(2) K                                    |                        |
| Wavelength                        | 0.71073 Å                                   |                        |
| Crystal system                    | Triclinic                                   |                        |
| Space group                       | P-1                                         |                        |
| Unit cell dimensions              | $a = 7.3006(5) \text{ \AA}$                 | $a = 104.105(5)^\circ$ |
|                                   | $b = 11.5980(7) \text{ \AA}$                | $b = 97.855(5)^\circ$  |
|                                   | $c = 12.6789(8) \text{ \AA}$                | $g = 96.998(5)^\circ$  |
| Volume                            | 1017.88(12) Å <sup>3</sup>                  |                        |
| Z                                 | 1                                           |                        |
| Density (calculated)              | 2.111 Mg/m <sup>3</sup>                     |                        |
| Absorption coefficient            | 6.405 mm <sup>-1</sup>                      |                        |
| F(000)                            | 616                                         |                        |
| Crystal size                      | 0.100 x 0.060 x 0.030 mm <sup>3</sup>       |                        |
| Theta range for data collection   | 3.364 to 29.201°                            |                        |
| Index ranges                      | -9<=h<=10, -15<=k<=15, -17<=l<=17           |                        |
| Reflections collected             | 8612                                        |                        |
| Independent reflections           | 4683 [R(int) = 0.0395]                      |                        |
| Completeness to theta = 25.242°   | 99.8 %                                      |                        |
| Refinement method                 | Full-matrix least-squares on F <sup>2</sup> |                        |
| Data / restraints / parameters    | 4683 / 0 / 271                              |                        |
| Goodness-of-fit on F <sup>2</sup> | 1.019                                       |                        |
| Final R indices [I>2sigma(I)]     | R1 = 0.0321, wR2 = 0.0557                   |                        |
| R indices (all data)              | R1 = 0.0361, wR2 = 0.0583                   |                        |
| Largest diff. peak and hole       | 1.350 and -1.345 e.Å <sup>-3</sup>          |                        |



**Table S8. Crystal data and structure refinement for C9 = ClFReBr**

|                                   |                                                                                                    |                           |
|-----------------------------------|----------------------------------------------------------------------------------------------------|---------------------------|
| Identification code               | <b>C9</b>                                                                                          |                           |
| Empirical formula                 | C <sub>21</sub> H <sub>12</sub> Br Cl <sub>2</sub> F <sub>6</sub> N <sub>2</sub> O <sub>3</sub> Re |                           |
| Formula weight                    | 791.34                                                                                             |                           |
| Temperature                       | 150(2) K                                                                                           |                           |
| Wavelength                        | 0.71073 Å                                                                                          |                           |
| Crystal system                    | Monoclinic                                                                                         |                           |
| Space group                       | <i>P</i> 2 <sub>1</sub> / <i>c</i>                                                                 |                           |
| Unit cell dimensions              | <i>a</i> = 7.2547(4) Å                                                                             | $\alpha = 90^\circ$       |
|                                   | <i>b</i> = 26.9040(16) Å                                                                           | $\beta = 93.127(6)^\circ$ |
|                                   | <i>c</i> = 12.6293(7) Å                                                                            | $\gamma = 90^\circ$       |
| Volume                            | 2461.3(2) Å <sup>3</sup>                                                                           |                           |
| Z                                 | 4                                                                                                  |                           |
| Density (calculated)              | 2.136 Mg/m <sup>3</sup>                                                                            |                           |
| Absorption coefficient            | 6.850 mm <sup>-1</sup>                                                                             |                           |
| F(000)                            | 1496                                                                                               |                           |
| Crystal size                      | 0.120 x 0.080 x 0.050 mm <sup>3</sup>                                                              |                           |
| Theta range for data collection   | 3.404 to 25.997°                                                                                   |                           |
| Index ranges                      | -8 ≤ <i>h</i> ≤ 8, -33 ≤ <i>k</i> ≤ 33, -15 ≤ <i>l</i> ≤ 15                                        |                           |
| Reflections collected             | 21636                                                                                              |                           |
| Independent reflections           | 4820 [R(int) = 0.0477]                                                                             |                           |
| Completeness to theta = 25.242°   | 99.8 %                                                                                             |                           |
| Refinement method                 | Full-matrix least-squares on F <sup>2</sup>                                                        |                           |
| Data / restraints / parameters    | 4820 / 0 / 325                                                                                     |                           |
| Goodness-of-fit on F <sup>2</sup> | 1.098                                                                                              |                           |
| Final R indices [I > 2σ(I)]       | R1 = 0.0331, wR2 = 0.0542                                                                          |                           |
| R indices (all data)              | R1 = 0.0442, wR2 = 0.0571                                                                          |                           |
| Largest diff. peak and hole       | 0.880 and -0.858 e.Å <sup>-3</sup>                                                                 |                           |

**Table S9. Crystal data and structure refinement for C10 = ClFReBr'.**

|                                   |                                                                                                    |                             |
|-----------------------------------|----------------------------------------------------------------------------------------------------|-----------------------------|
| Identification code               | <b>C10</b>                                                                                         |                             |
| Empirical formula                 | C <sub>21</sub> H <sub>12</sub> Br Cl <sub>2</sub> F <sub>6</sub> N <sub>2</sub> O <sub>3</sub> Re |                             |
| Formula weight                    | 791.34                                                                                             |                             |
| Temperature                       | 100(2) K                                                                                           |                             |
| Wavelength                        | 0.71073 Å                                                                                          |                             |
| Crystal system                    | Monoclinic                                                                                         |                             |
| Space group                       | <i>P</i> 2 <sub>1</sub> / <i>c</i>                                                                 |                             |
| Unit cell dimensions              | a = 9.6938(1)                                                                                      | $\alpha = 90^\circ$         |
|                                   | b = 12.9012(2)                                                                                     | $\beta = 91.1190(10)^\circ$ |
|                                   | c = 22.2519(3)                                                                                     | $\gamma = 90^\circ$         |
| Volume                            | 2782.33(6) Å <sup>3</sup>                                                                          |                             |
| Z                                 | 4                                                                                                  |                             |
| Density (calculated)              | 1.889 Mg/m <sup>3</sup>                                                                            |                             |
| Absorption coefficient            | 6.060 mm <sup>-1</sup>                                                                             |                             |
| F(000)                            | 1496                                                                                               |                             |
| Crystal size                      | 0.314 x 0.226 x 0.050 mm <sup>3</sup>                                                              |                             |
| Theta range for data collection   | 1.825 to 30.856°                                                                                   |                             |
| Index ranges                      | -13 ≤ h ≤ 13, -18 ≤ k ≤ 18, -32 ≤ l ≤ 29                                                           |                             |
| Reflections collected             | 36476                                                                                              |                             |
| Independent reflections           | 8709 [R(int) = 0.0518]                                                                             |                             |
| Completeness to theta = 25.242°   | 99.9 %                                                                                             |                             |
| Refinement method                 | Full-matrix least-squares on F <sup>2</sup>                                                        |                             |
| Data / restraints / parameters    | 8709 / 0 / 325                                                                                     |                             |
| Goodness-of-fit on F <sup>2</sup> | 1.061                                                                                              |                             |
| Final R indices [I > 2σ(I)]       | R1 = 0.0381, wR2 = 0.0905                                                                          |                             |
| R indices (all data)              | R1 = 0.0627, wR2 = 0.1031                                                                          |                             |
| Largest diff. peak and hole       | 1.169 and -1.882 e.Å <sup>-3</sup>                                                                 |                             |

Calculated electrostatic potential surfaces for complexes C1-C10 with G09-BP86-D3/def2-TZVP. Colour scale: positive (blue = +0.045 a.u.); negative (red = -0.045 a.u.).

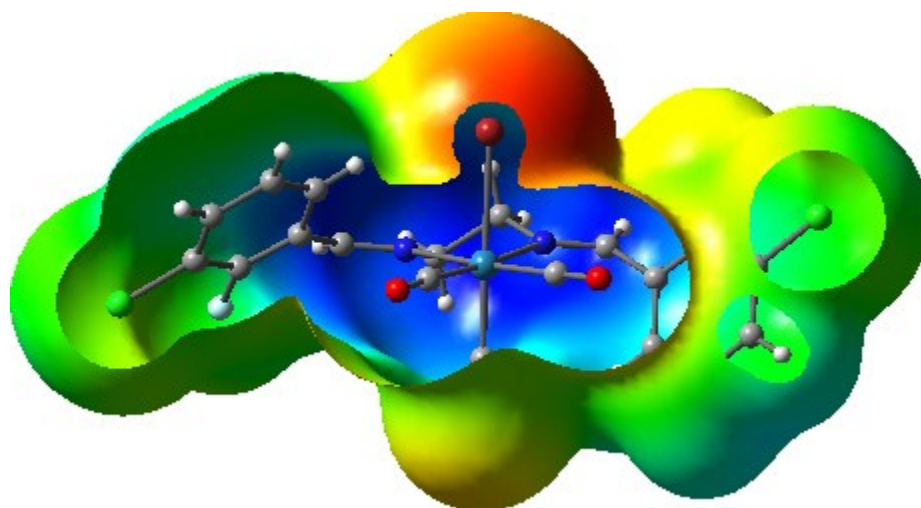

Fig. S17. MEP of C1 [isovalue at -0.045 to 0.045].

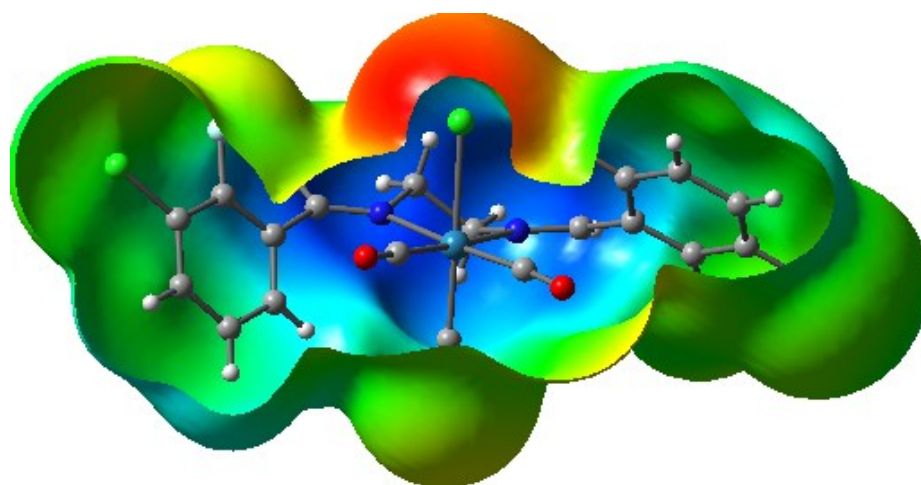

Fig. S18. MEP of C2 [isovalue at -0.045 to 0.045].

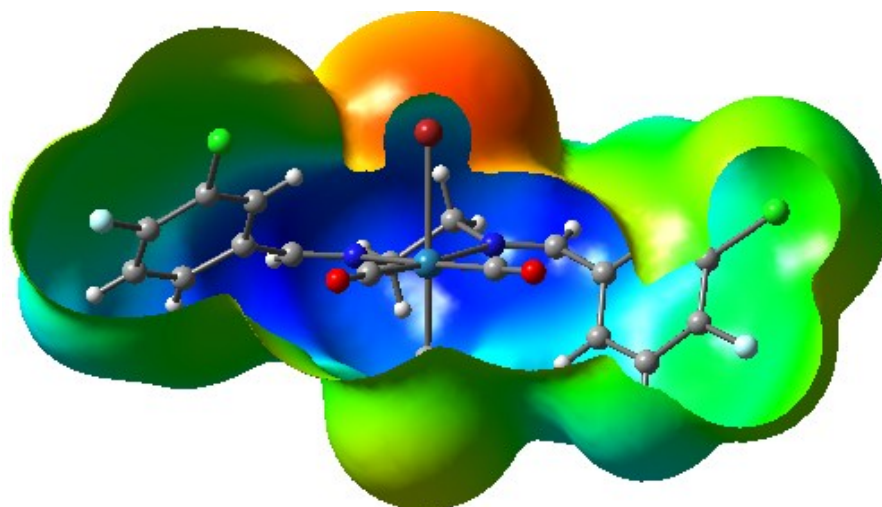

**Fig. S19.** MEP of C3 [isovalue at -0.045 to 0.045].

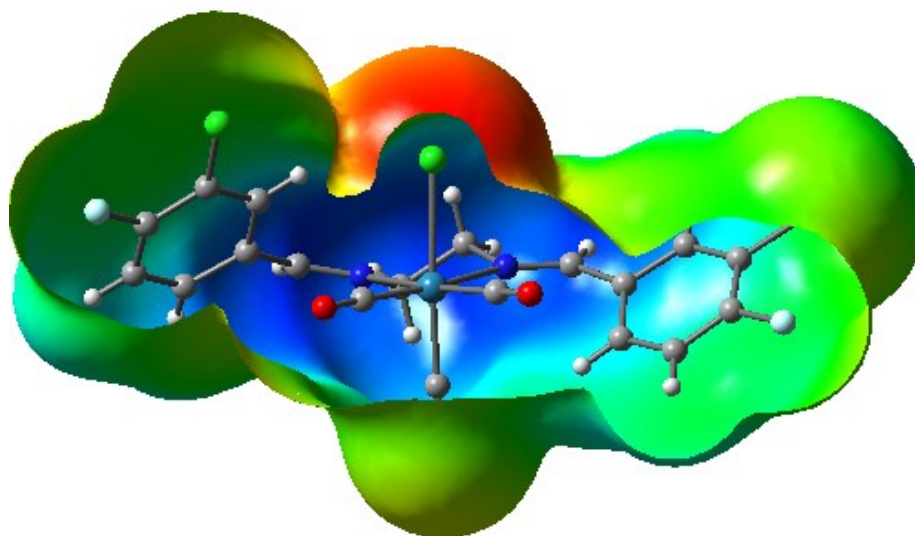

**Fig. S20.** MEP of C4 [isovalue at -0.045 to 0.045].

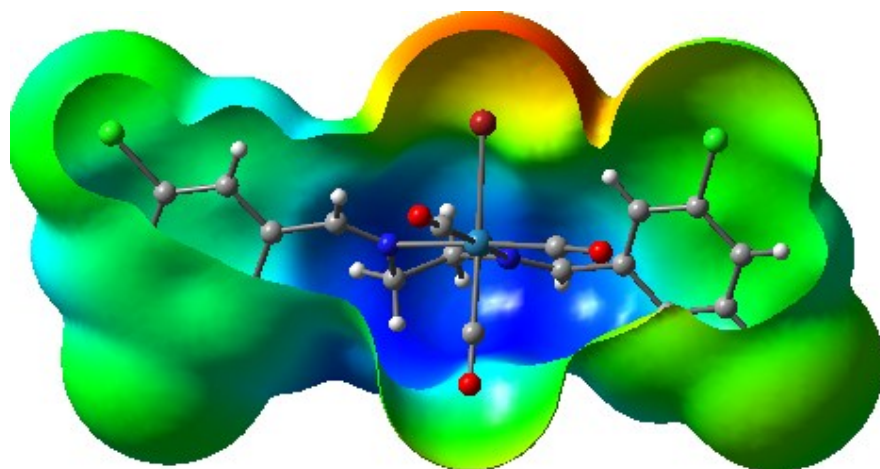

**Fig. S21.** MEP of C5 [isovalue at -0.045 to 0.045].

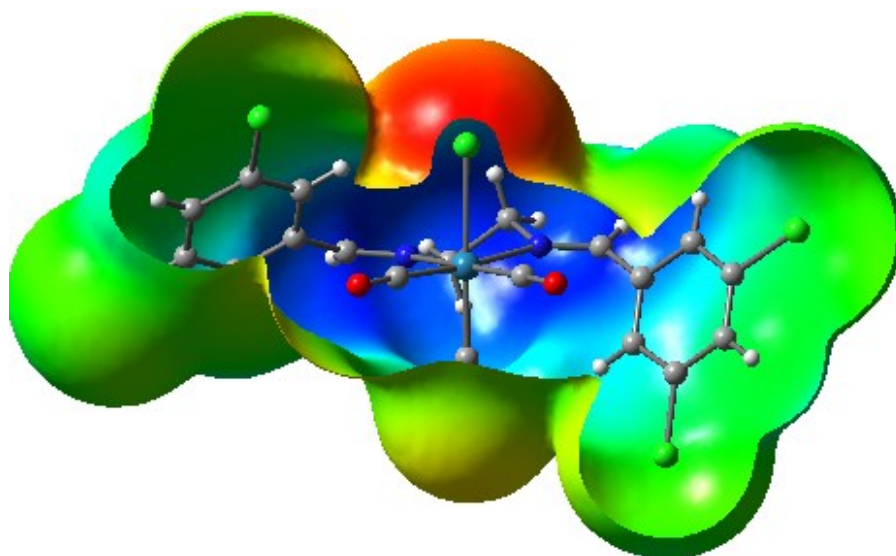

**Fig. S22.** MEP of C6 [isovalue at -0.045 to 0.045].

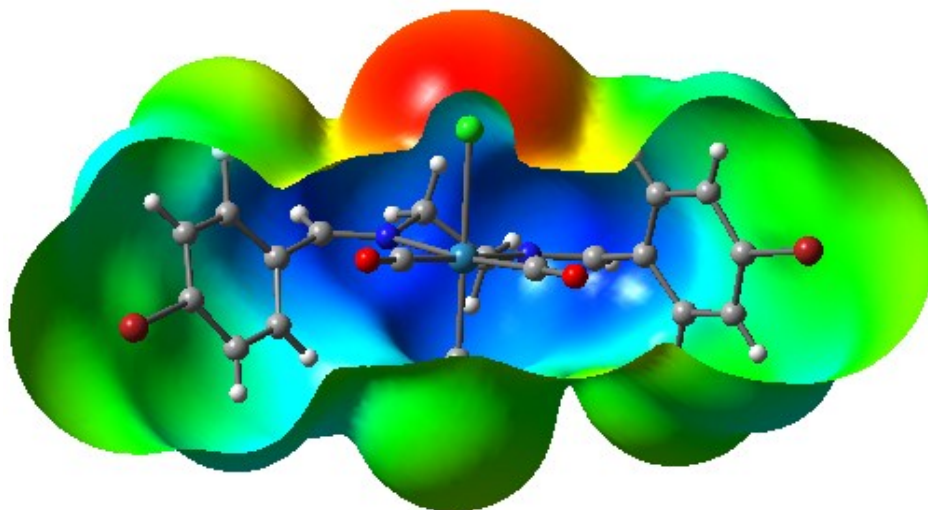

**Fig. S23.** MEP of C7 [isovalue at -0.045 to 0.045].

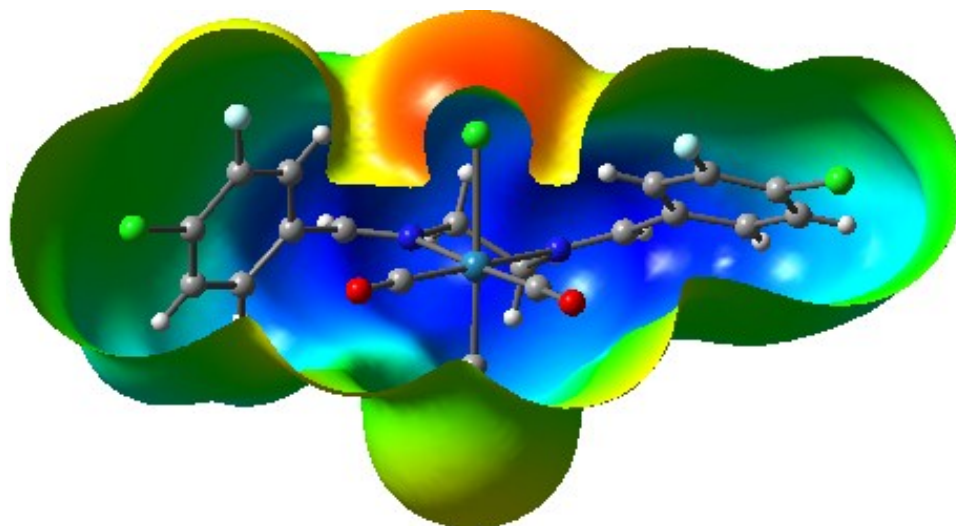

**Fig. S24.** MEP of C8 [isovalue at -0.045 to 0.045].

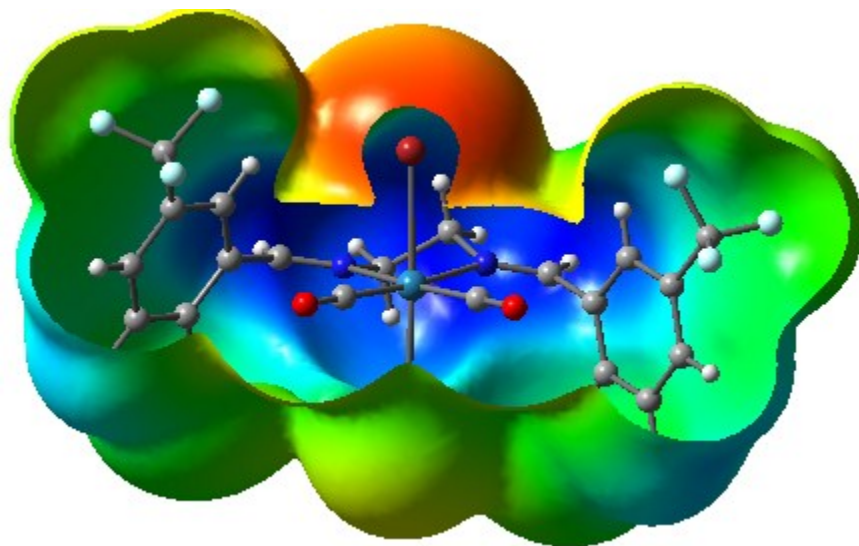

**Fig. S25.** MEP of C9 [isovalue at -0.045 to 0.045].

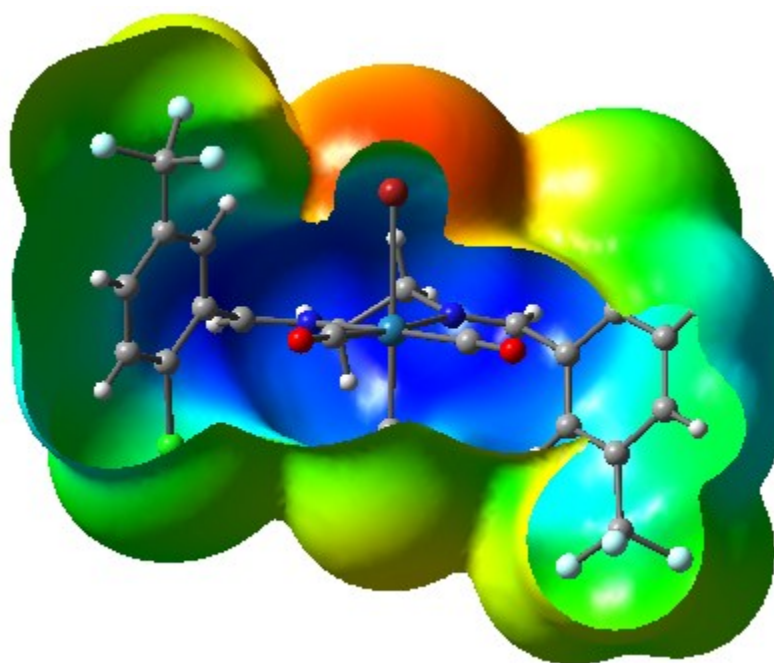

**Fig. S26.** MEP of C10 [isovalue at -0.045 to 0.045].

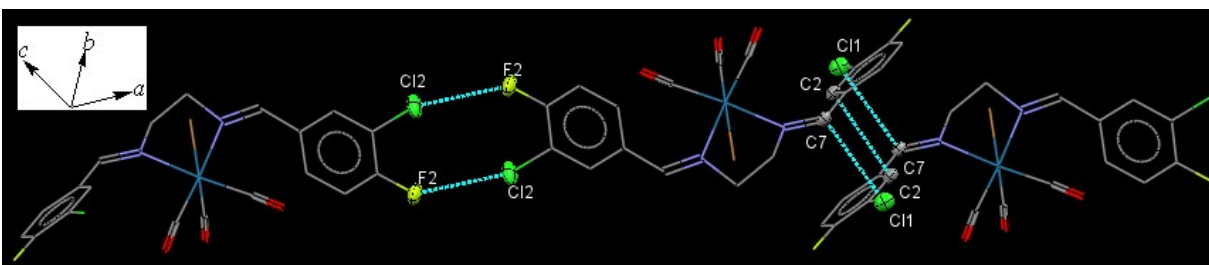

**Fig. S27.** Individual dimer formation in **C3** through the pair of intermolecular Cl...F interactions supported by C...Cl and C...C contacts.

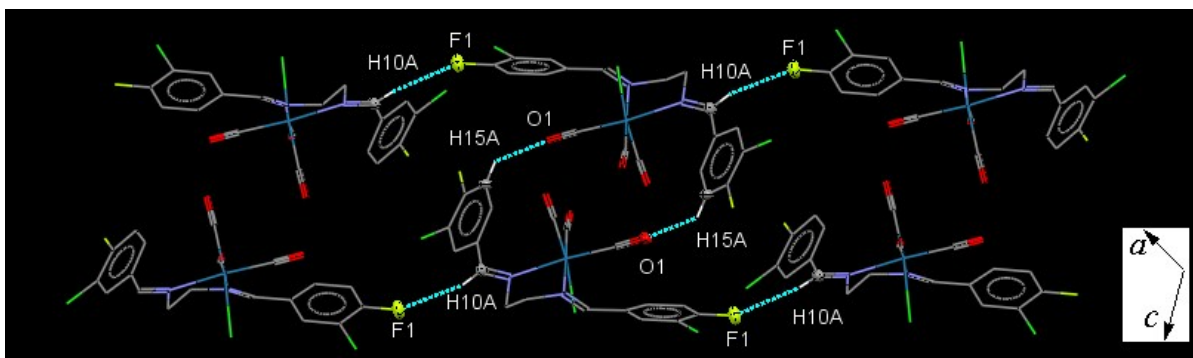

**Fig. S28.** Part of the crystal packing of **C4** viewed down the *b*-axis, showing head-to-tail individual dimer formation through C-H...O, further supported by the intermolecular C-H...F interactions.

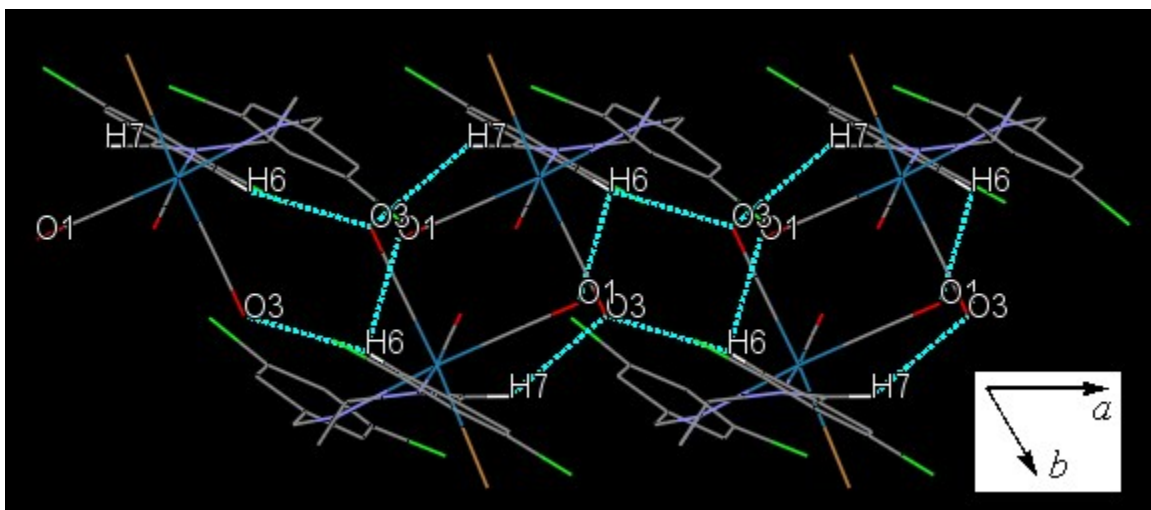

**Fig. S29.** Pair of intermolecular C7-H7...O3 and C6-H6...O1 hydrogen bonds form a centrosymmetric dimer in **C5**, linking molecules into an infinite chain along the *a*-axis.



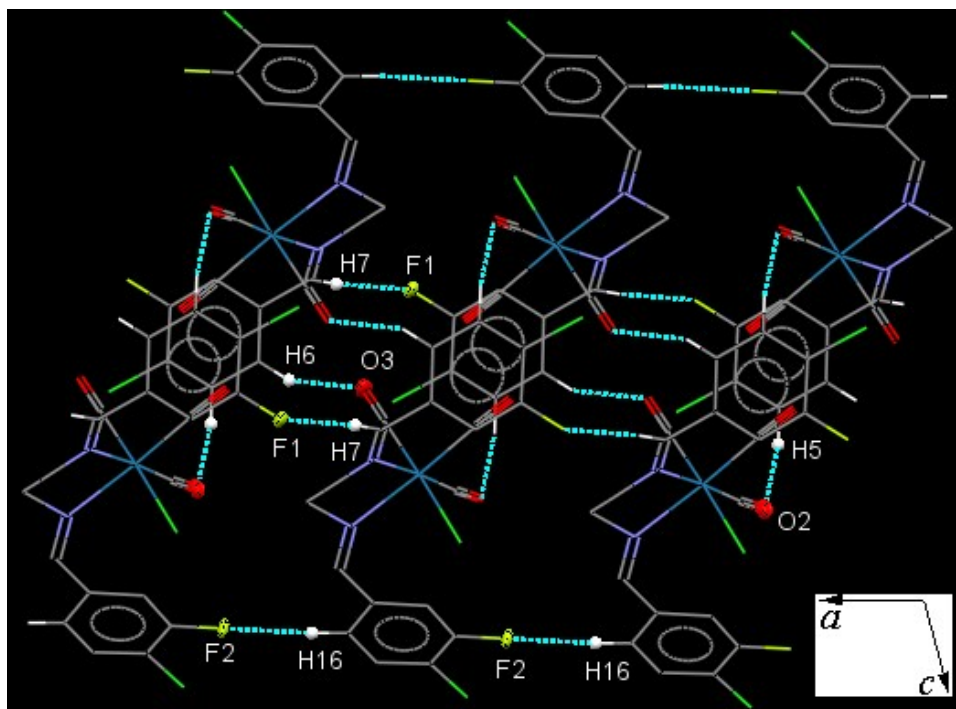

**Fig. S30.** Part of the crystal packing of **C8**, showing interconnected chains of neighboring molecules through the intermolecular  $C1 \cdots Br$  halogen bond along  $[110]$  direction.

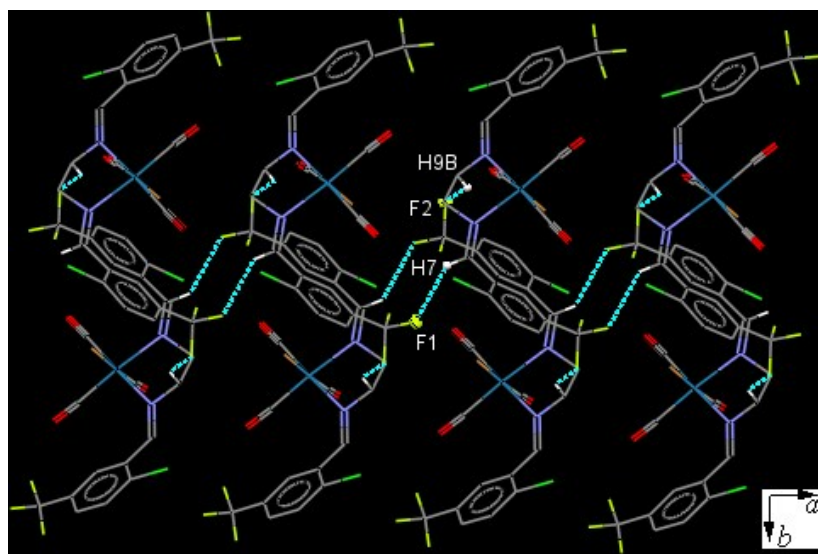

**Fig. S31.** Part of the packing of **C9**, showing connection of neighboring molecules into one-dimensional extended chain along the  $c$ -axis through  $C-H \cdots F$  interactions.

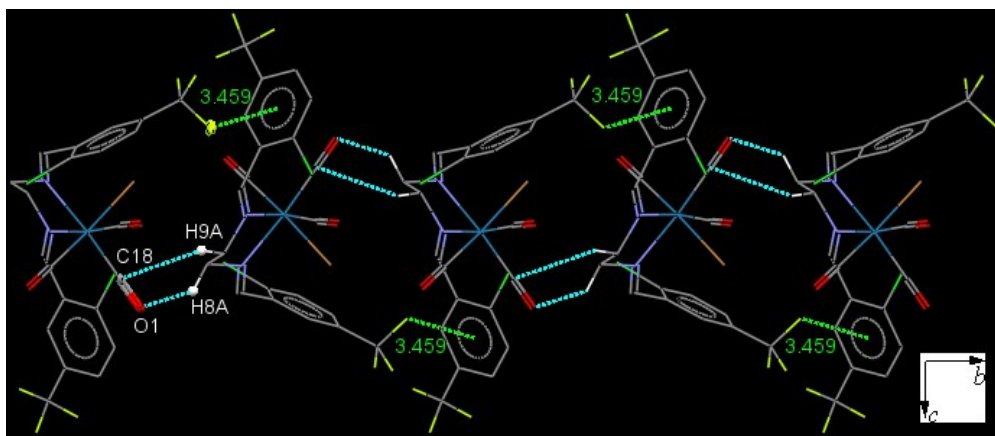

**Fig. S32.** One-dimensional extended chain of **C10** along the *b*-axis through intermolecular C–F $\cdots$  $\pi$ , C–H $\cdots$ O and C–H $\cdots$  $\pi$  interactions.

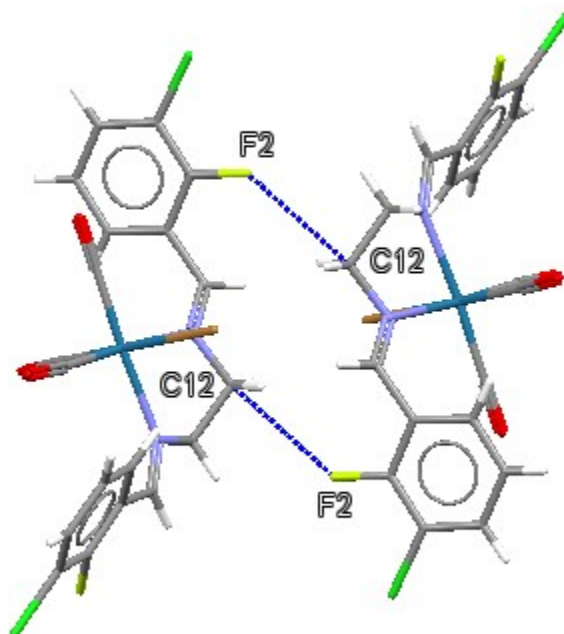

**Fig. S33a.** Dimer of **C1** formed from crystallographic coordinates.

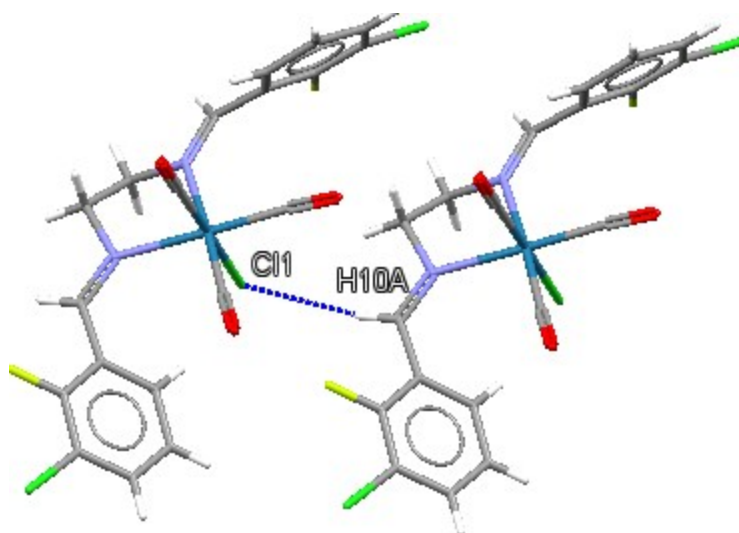

**Fig. S33b.** Dimer of C2 formed from crystallographic coordinates.

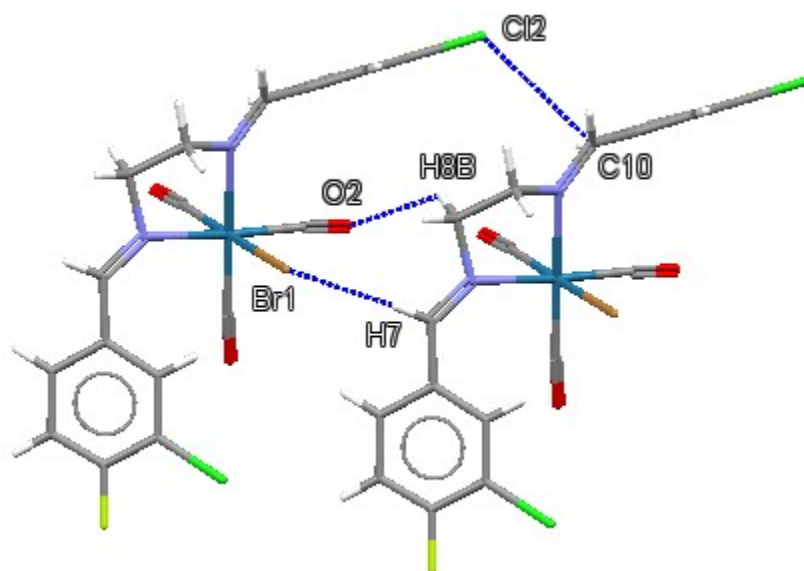

**Fig. S33c.** Dimer of C3 formed from crystallographic coordinates.

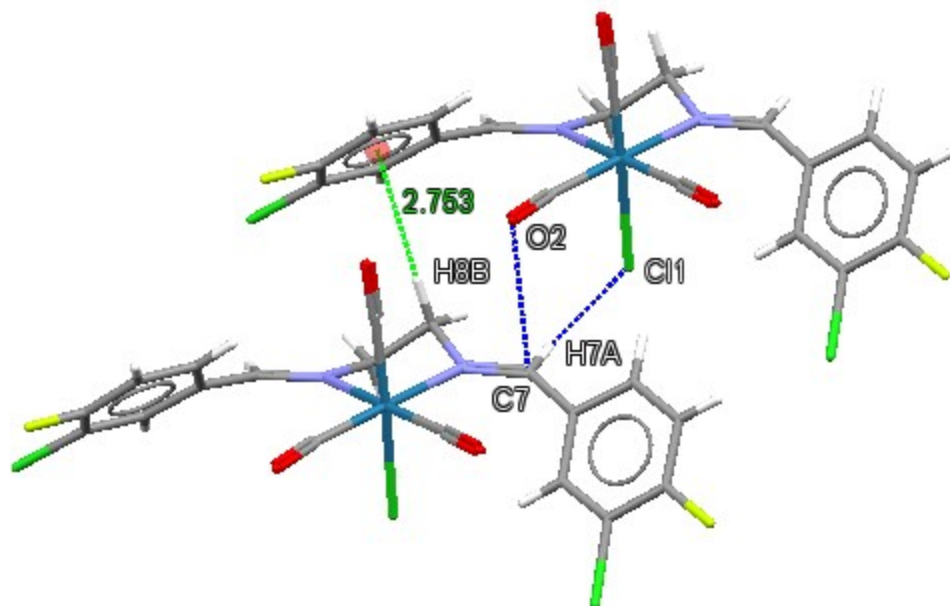

Fig. S33d. Dimer of C4 formed from crystallographic coordinates.

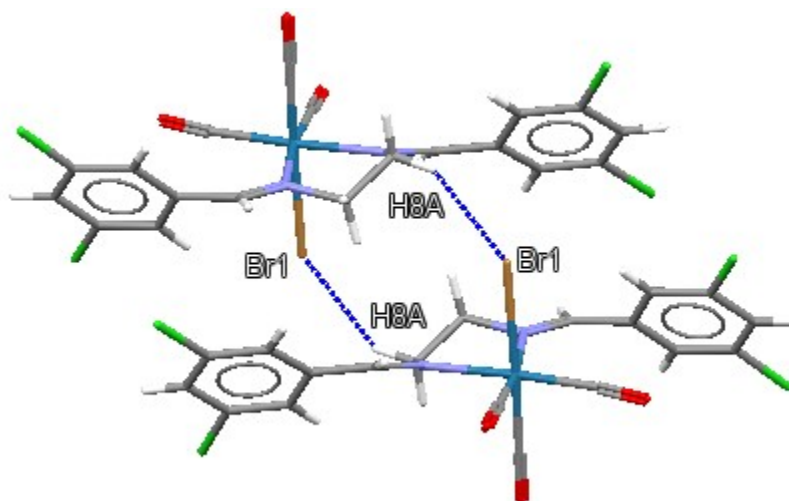

Fig. S33e. Dimer of C5 formed from crystallographic coordinates.

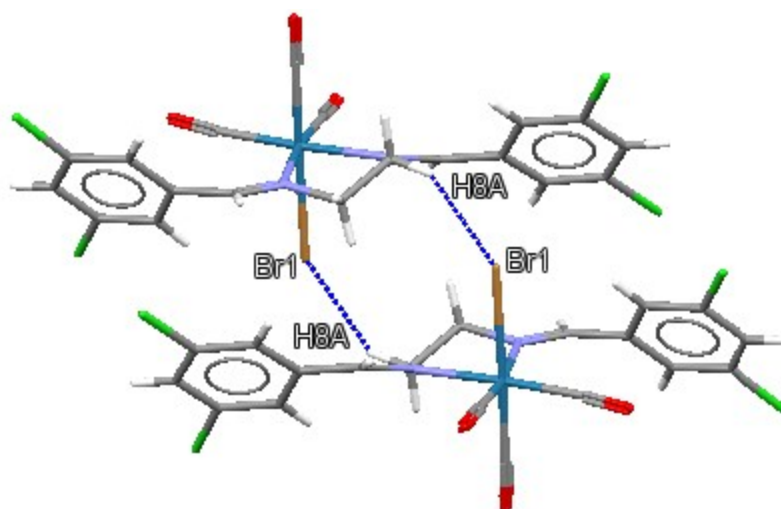

**Fig. S33f.** Dimer of C5 formed from crystallographic coordinates.

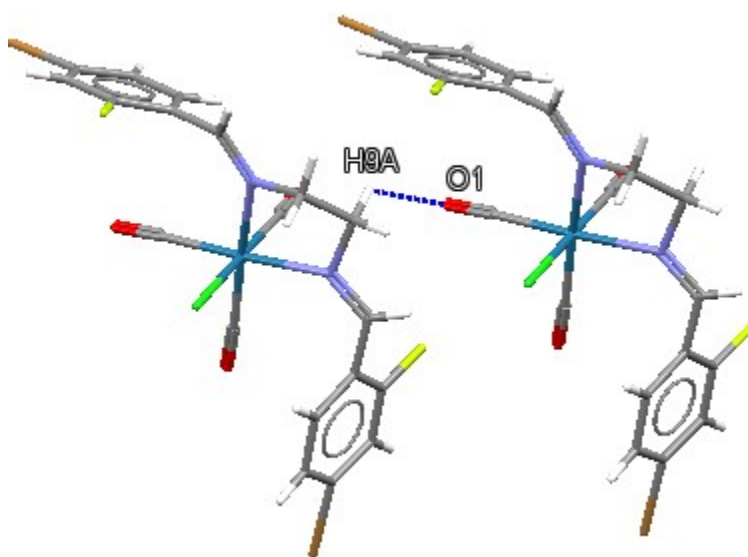

**Fig. S33g.** Dimer of C7 formed from crystallographic coordinates.

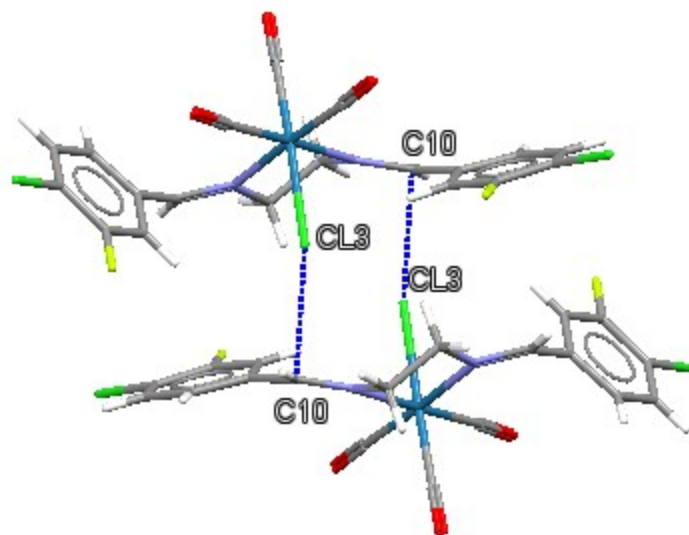

**Fig. S33h.** Dimer of C8 formed from crystallographic coordinates.

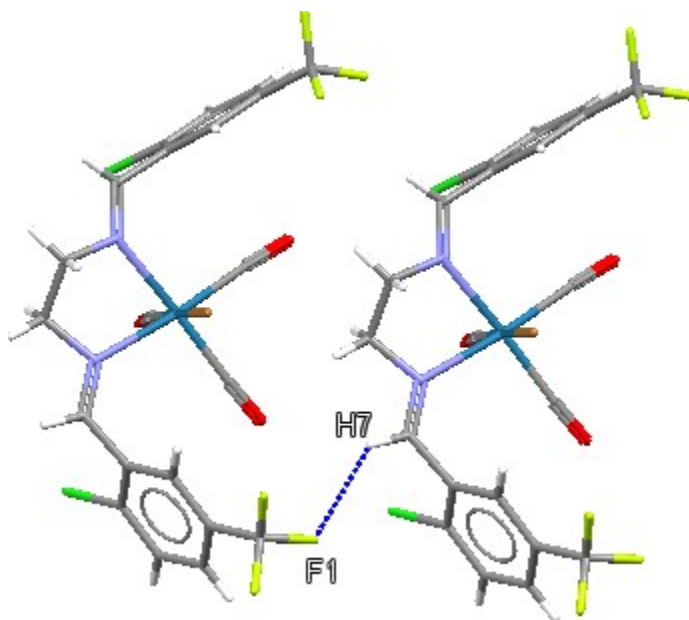

**Fig. S33i.** Dimer of C9 formed from crystallographic coordinates.

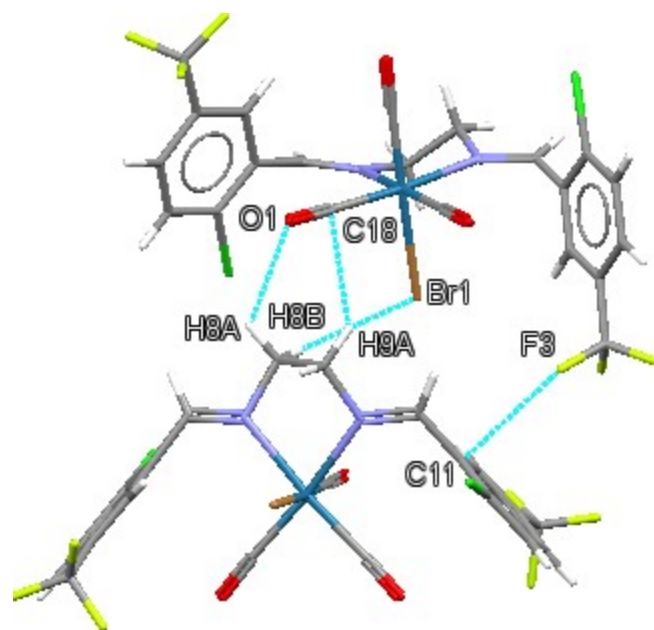

**Fig. S33j.** Dimer of C10 formed from crystallographic coordinates.

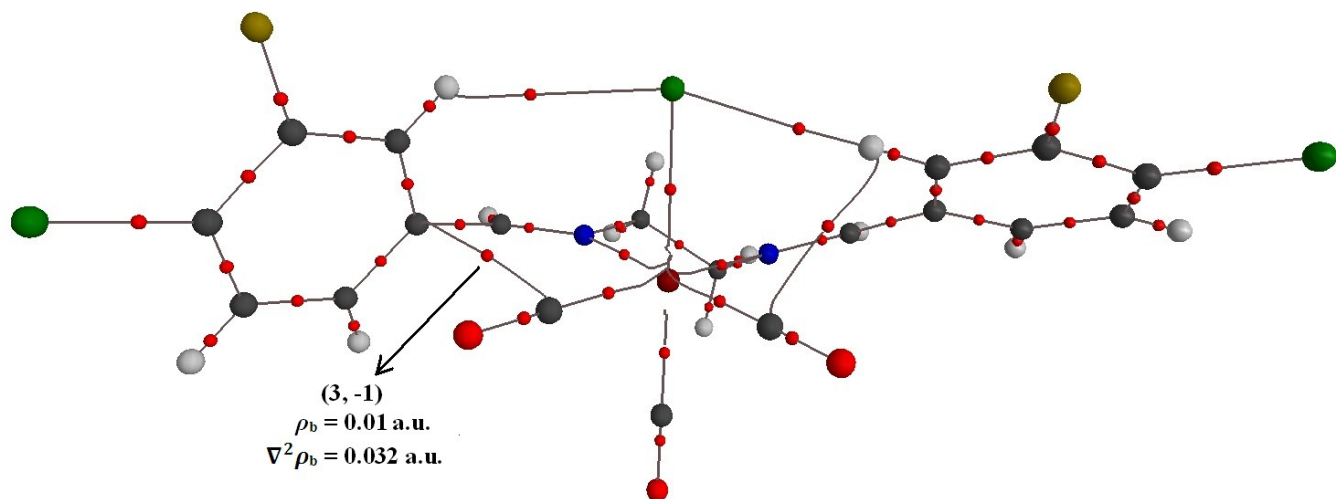

**Fig. S34a.** The bond critical points (BCPs) with their bond paths in **C8**. The specified BCP shows the interaction of the carbonyl group with the arene ring.

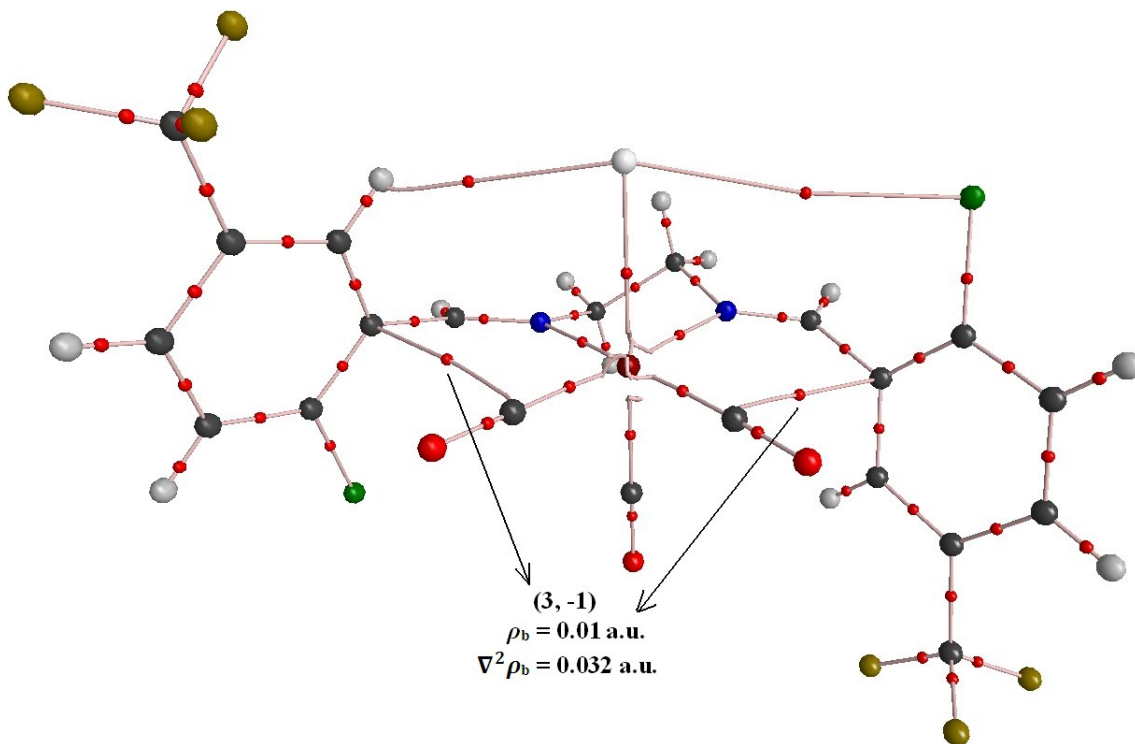

**Fig. S34b.** The bond critical points (BCPs) with their bond paths in **C10**. The specified BCP shows the interaction of the carbonyl group with the arene ring.



**Fig. S35a-o:**

The intermolecular interaction iso-surfaces generated by NCIPLOT for  $s = 0.3$  and  $-0.03 < \rho \cdot \text{sign}(\lambda_2) < +0.03$  [colour scale: attractive (blue)  $\rightarrow$  repulsive (red)] (top) and plots of  $\rho \cdot \text{sign}(\lambda_2)$  vs. reduced density gradient highlighting the favorable interaction corresponding to the halogen bond (down).

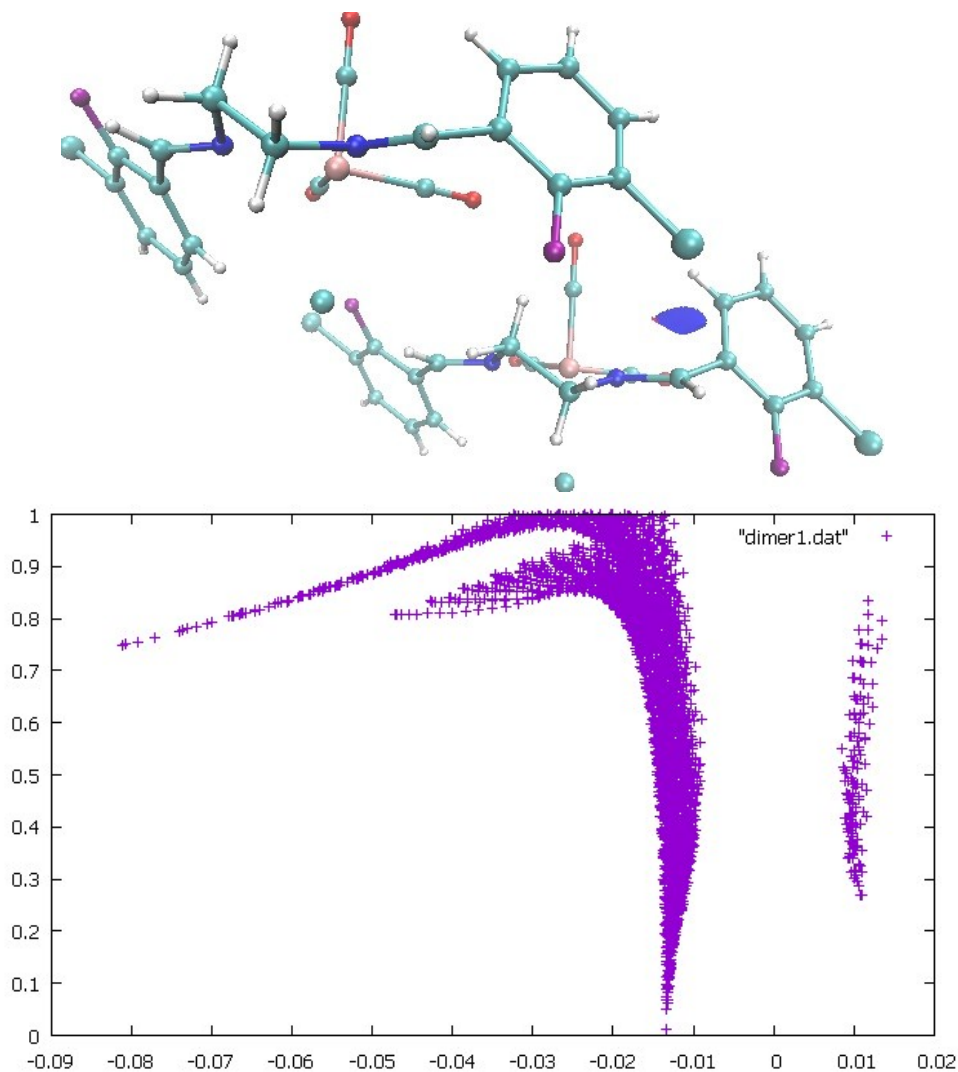

**Fig. S35a.** Intermolecular **C12...C13** isosurface (top) and its corresponding RDG vs.  $\rho \cdot \text{sign}(\lambda_2)$  plot (down) in **C1 (32CIFReBr)**.

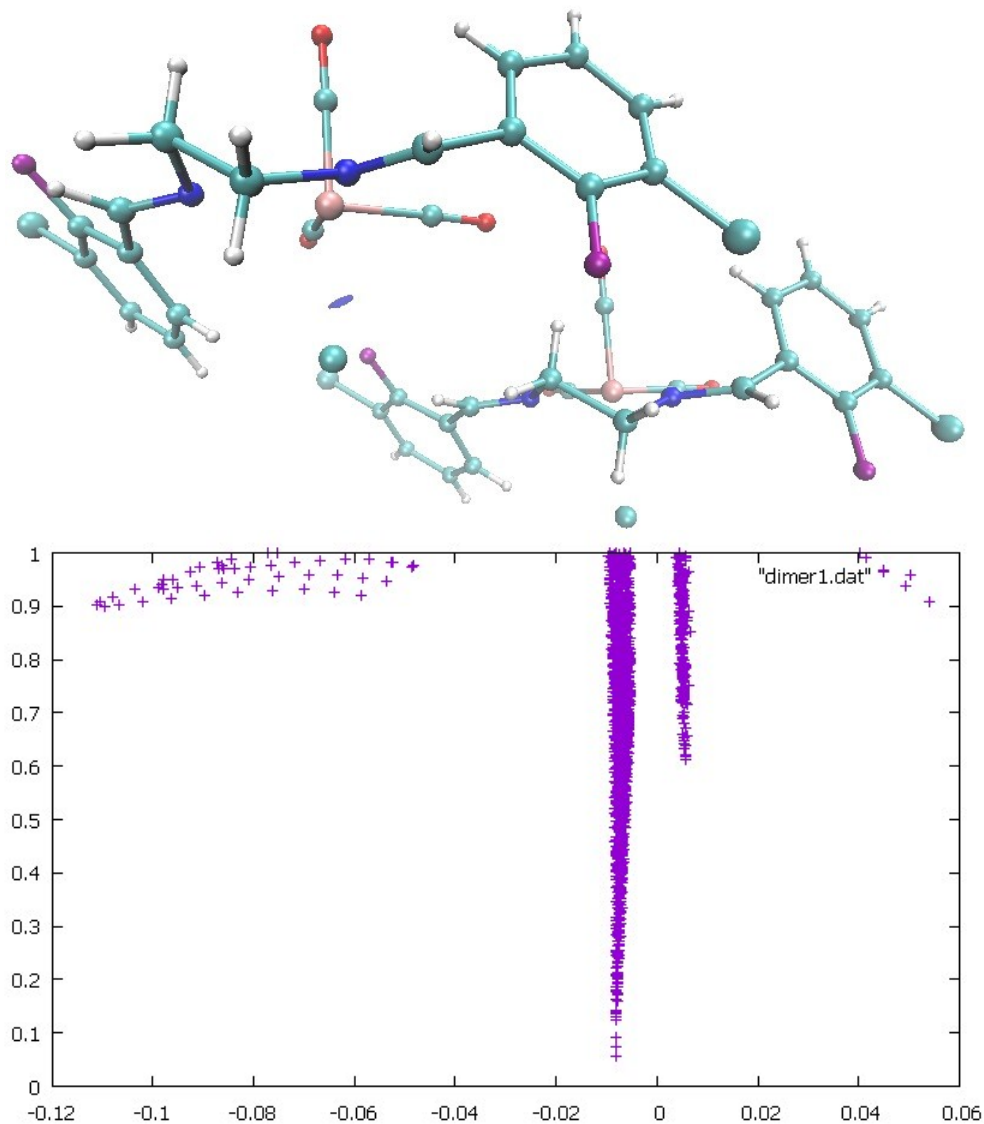

**Fig. S35b.** Intermolecular F1...O2 isosurface (top) and its corresponding RDG vs.  $\rho \cdot \text{sign}(\lambda_2)$  plot (down) in C1 (32ClFReBr).

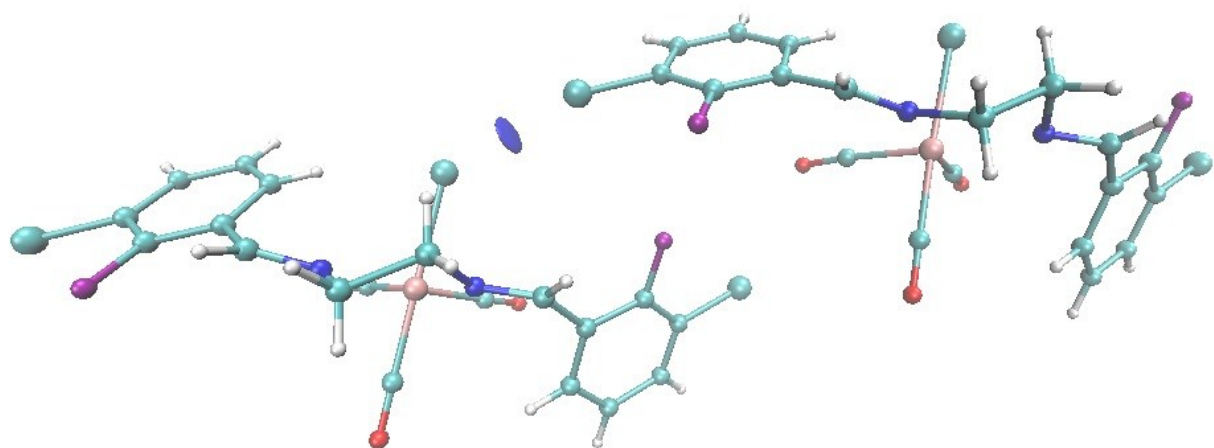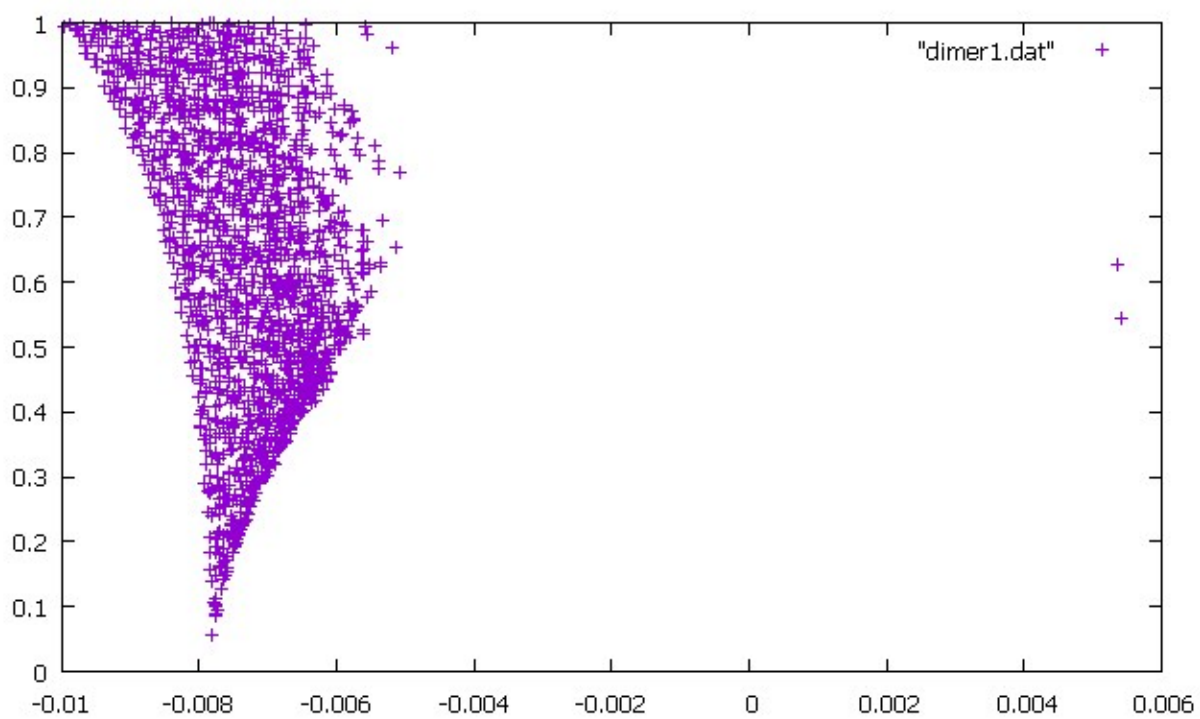

**Fig. S35c.** Intermolecular **Cl1...Cl3** isosurface (top) and its corresponding RDG vs.  $\rho \cdot \text{sign}(\lambda_2)$  plot (down) in **C2 (32CIFReCl)**.

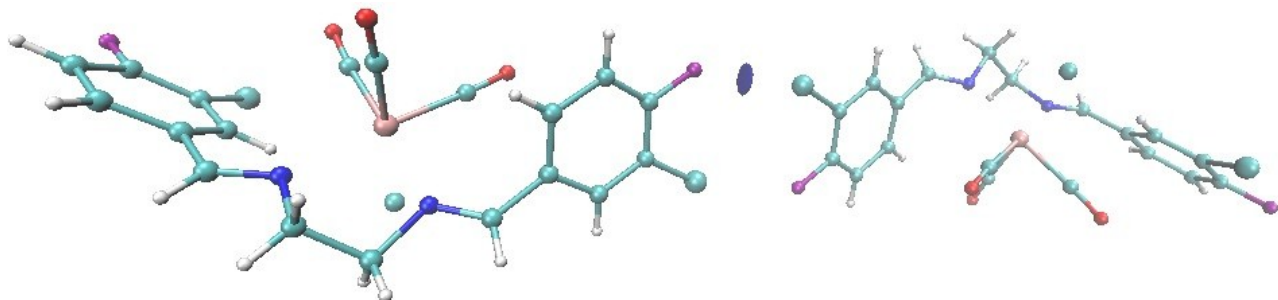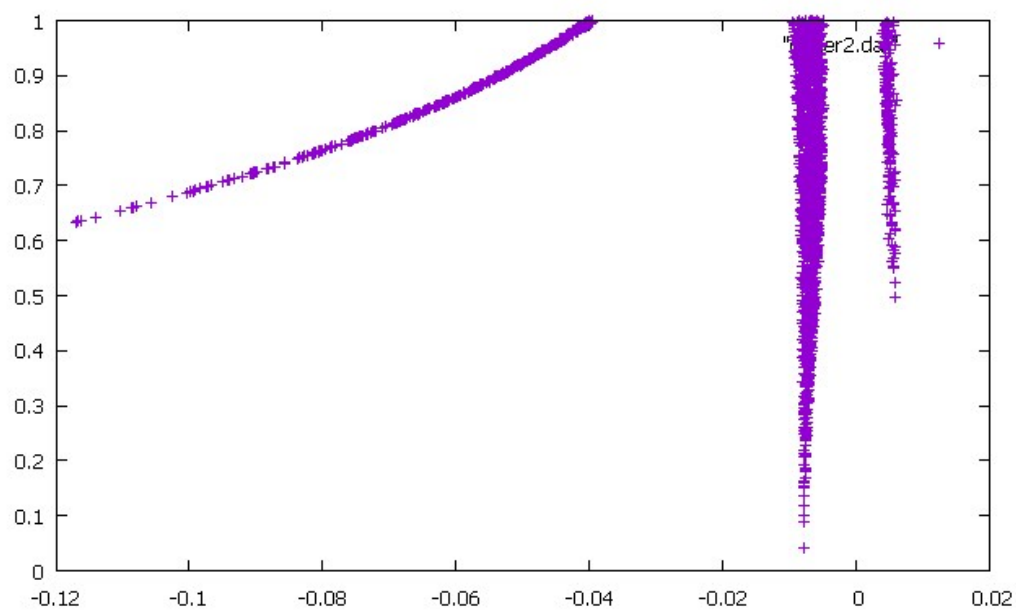

**Fig. S35d.** Intermolecular Cl1...F1 isosurface (top) and its corresponding RDG vs.  $\rho \cdot \text{sign}(\lambda_2)$  plot (down) in C3 (34CIFReBr).

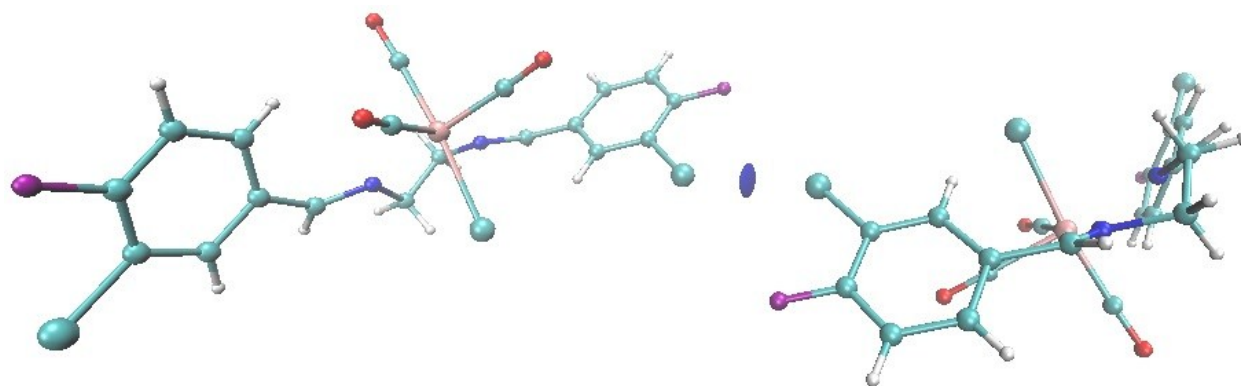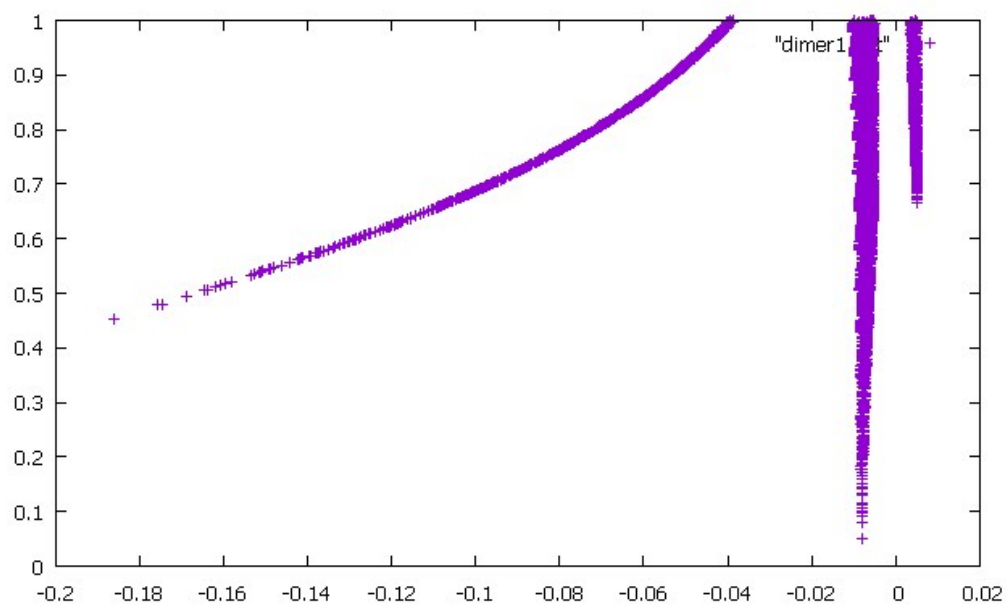

**Fig. S35e.** Intermolecular Cl2...F2 isosurface (top) and its corresponding RDG vs.  $\rho \cdot \text{sign}(\lambda_2)$  plot (down) in C4 (34CIFReCl).

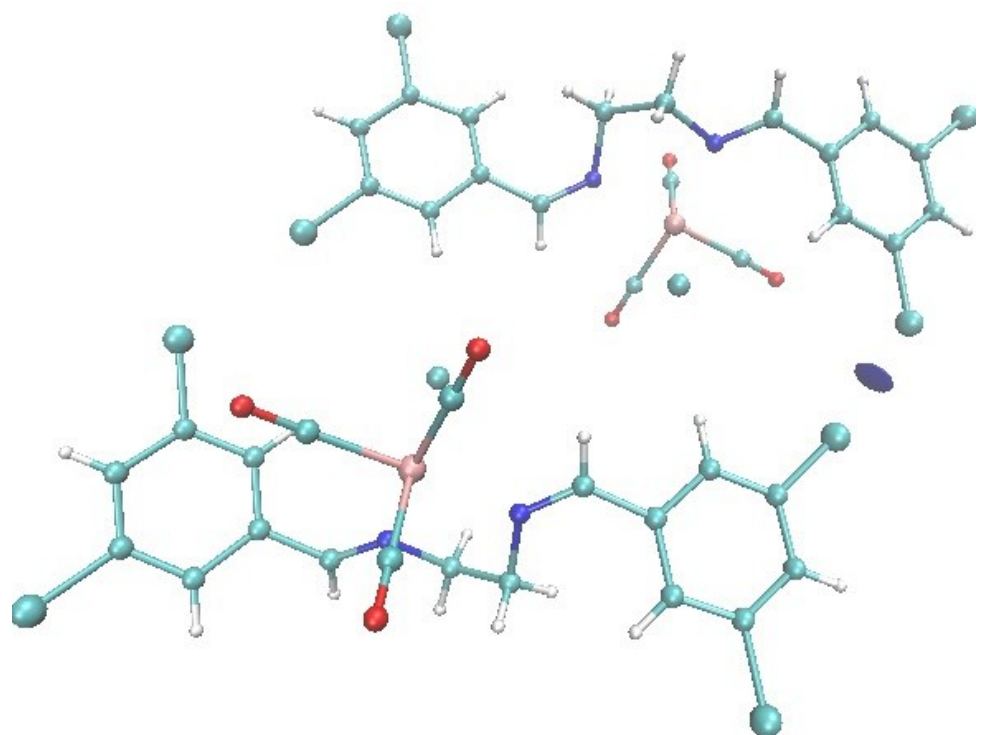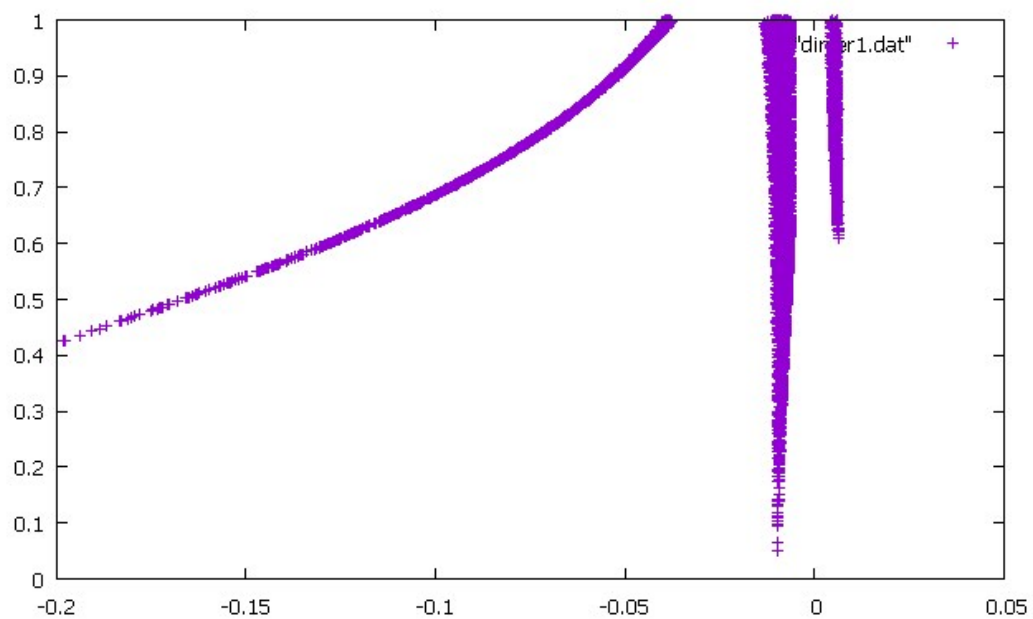

**Fig. S35f.** Intermolecular C11...Cl3 isosurface (top) and its corresponding RDG vs.  $\rho \cdot \text{sign}(\lambda_2)$  plot (down) in C5 (35ClenReBr).

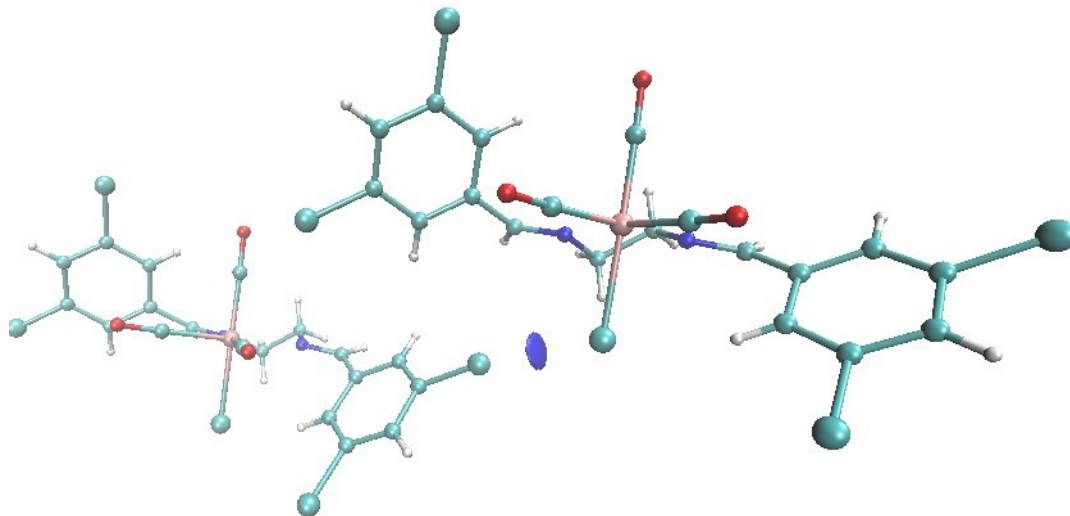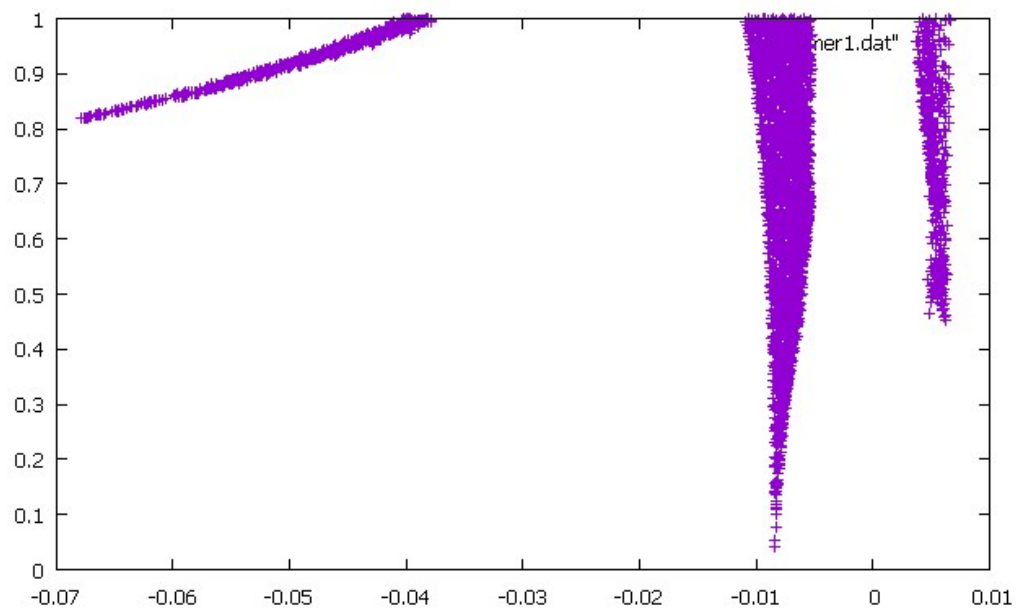

**Fig. S35g.** Intermolecular Cl1...Cl3 isosurface (top) and its corresponding RDG vs.  $\rho^*\text{sign}(\lambda_2)$  plot (down) in C6 (35ClenReCl).

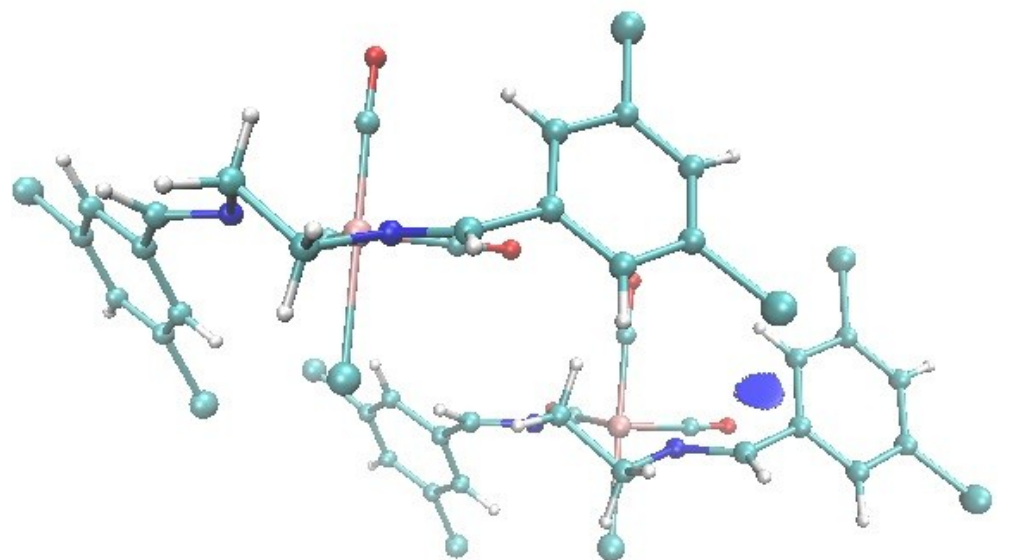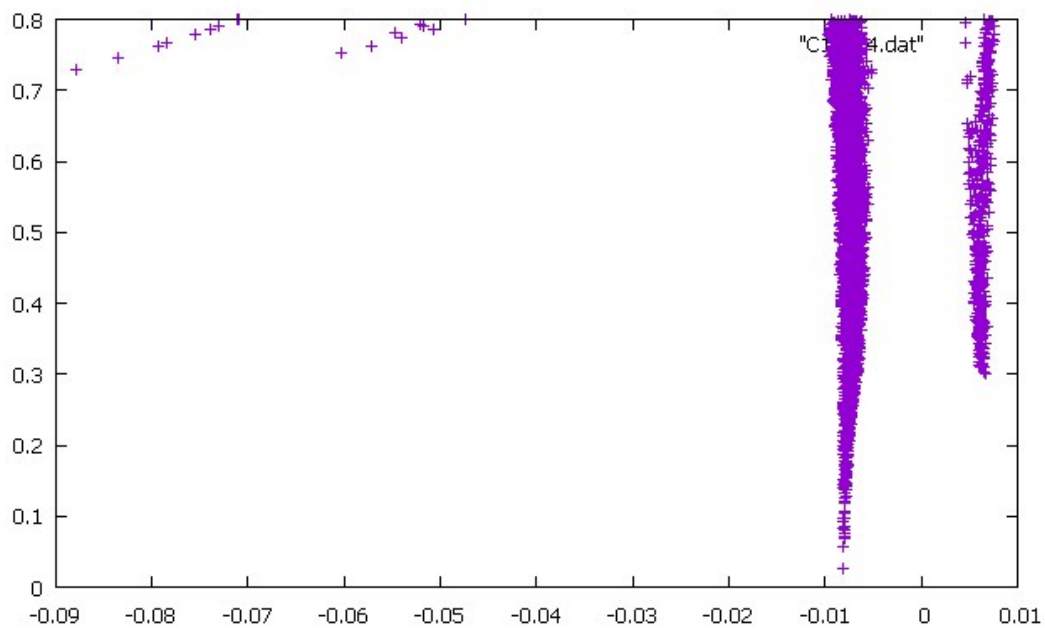

**Fig. S35h.** Intermolecular **C14...C10** isosurface (top) and its corresponding RDG vs.  $\rho \cdot \text{sign}(\lambda_2)$  plot (down) in **C6 (35ClenReCl)**.



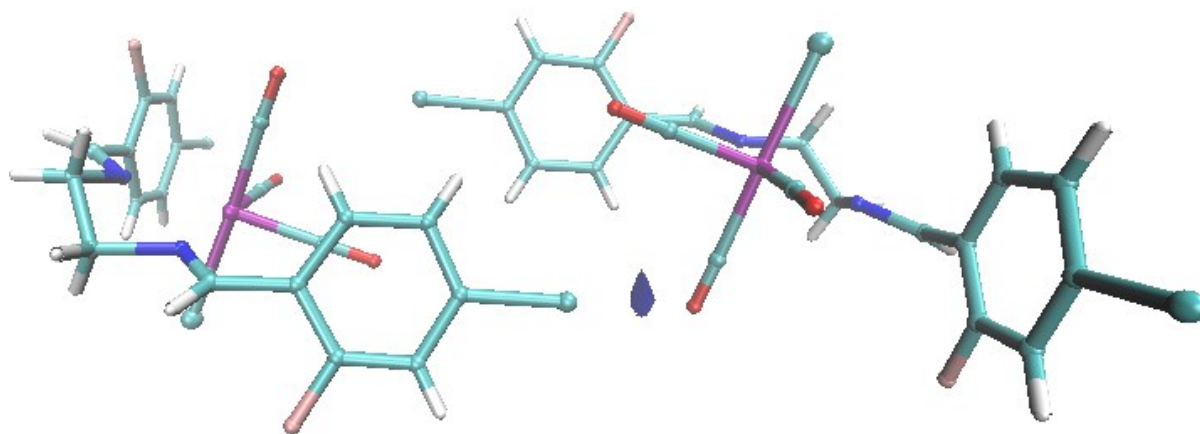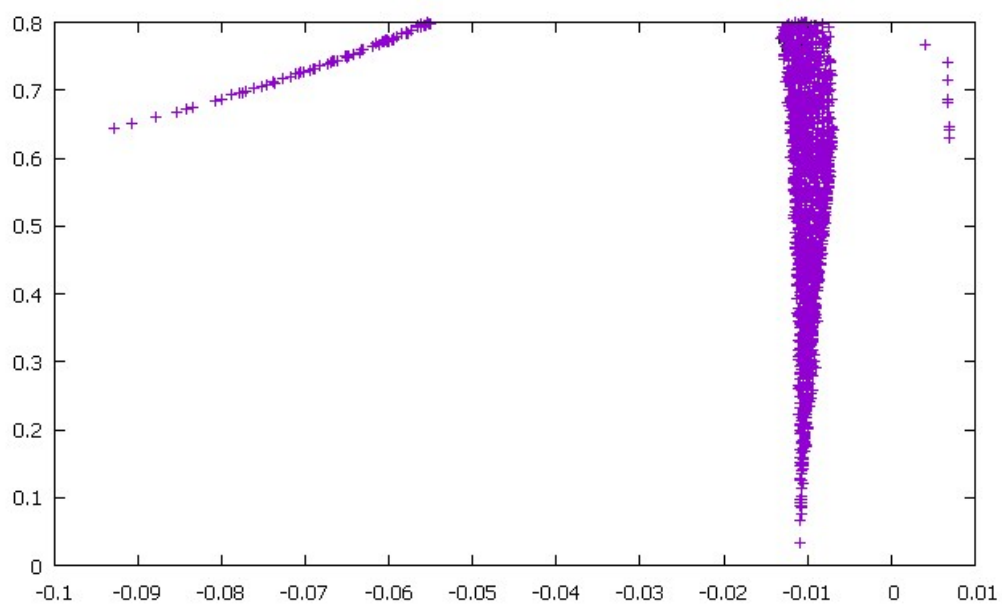

**Fig. S35i.** Intermolecular **Br1...O3** isosurface (top) and its corresponding RDG vs.  $\rho \cdot \text{sign}(\lambda_2)$  plot (down) in **C7 (42BrFenReCl)**.

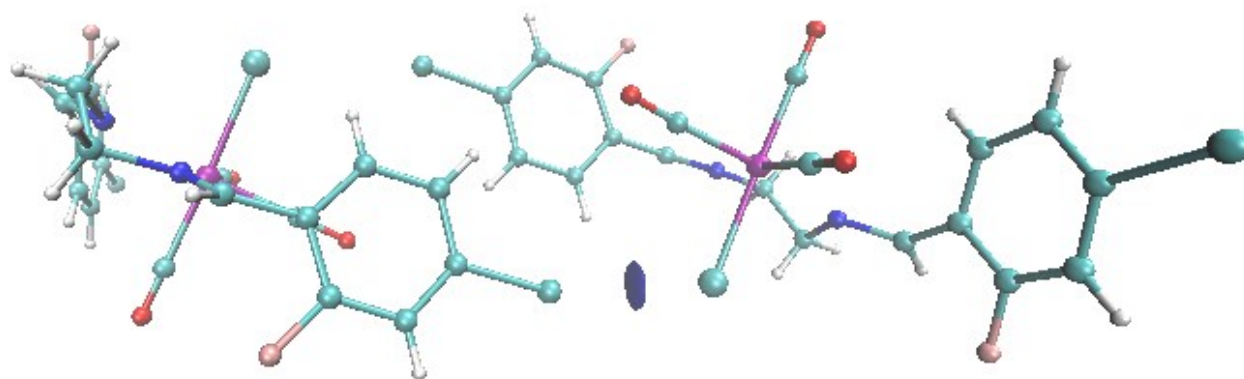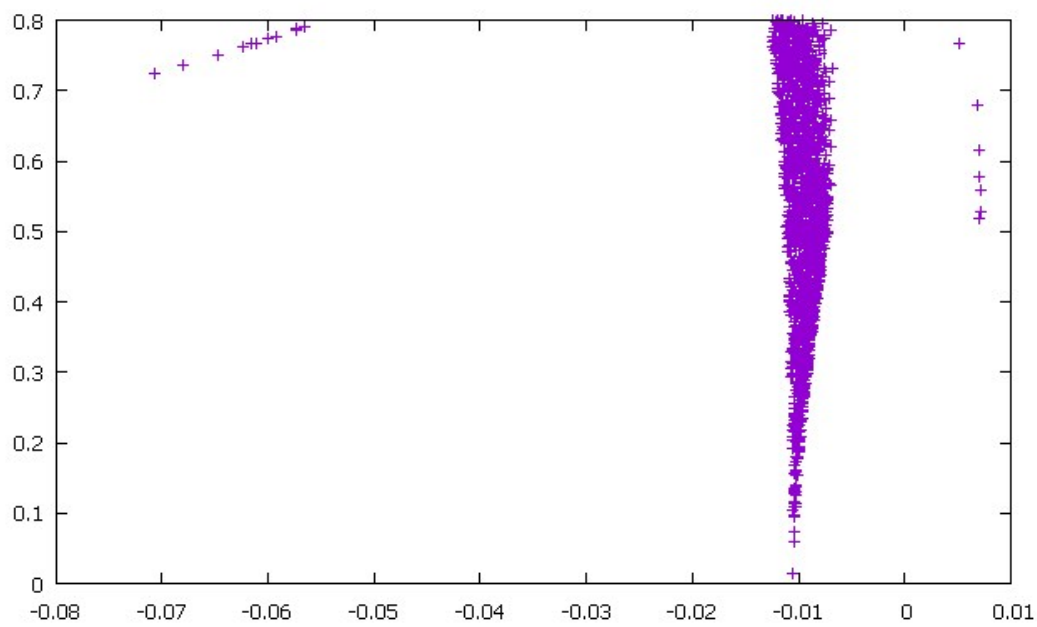

**Fig. S35j.** Intermolecular **Cl1...Br2** isosurface (top) and its corresponding RDG vs.  $\rho^*\text{sign}(\lambda_2)$  plot (down) in **C7 (42BrFenReCl)**.

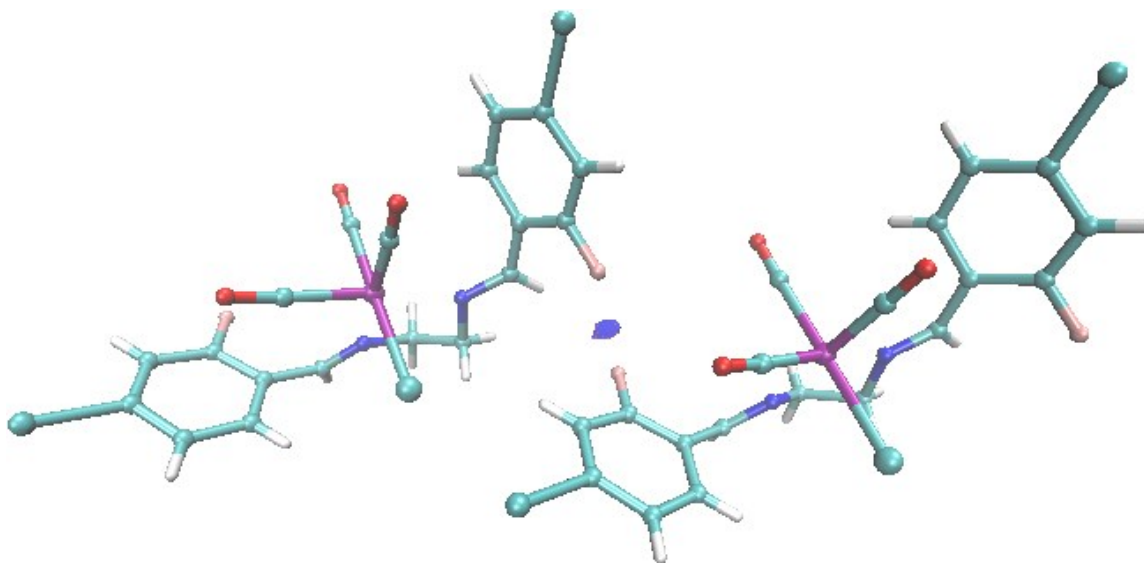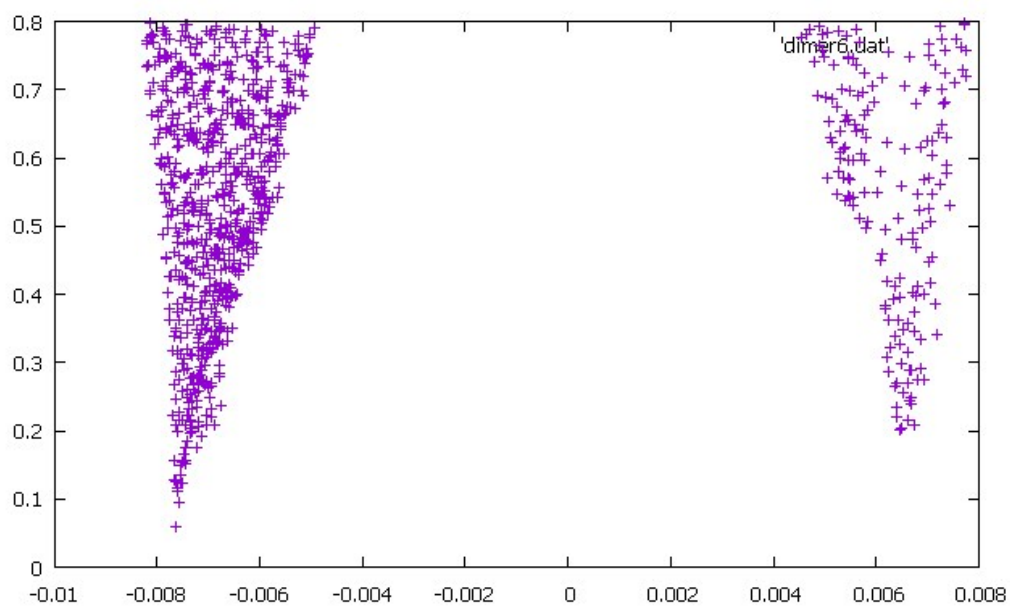

**Fig. S35k.** Intermolecular  $F1 \cdots F2$  isosurface (top) and its corresponding RDG vs.  $\rho \cdot \text{sign}(\lambda_2)$  plot (down) in **C7 (42BrFenReCl)**.

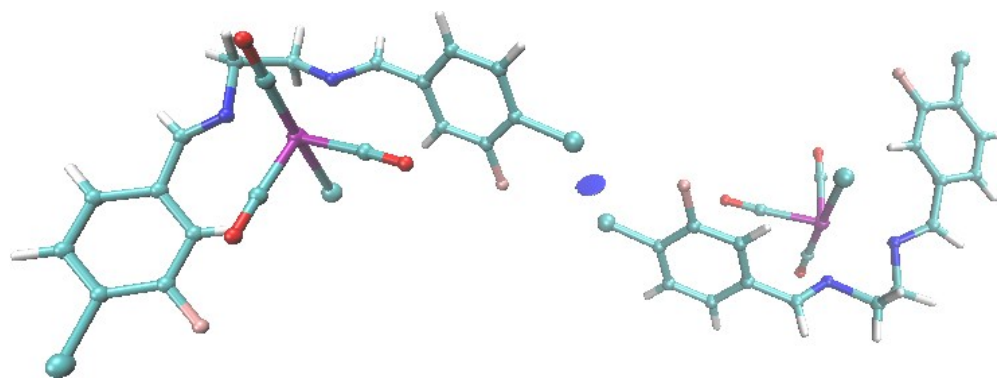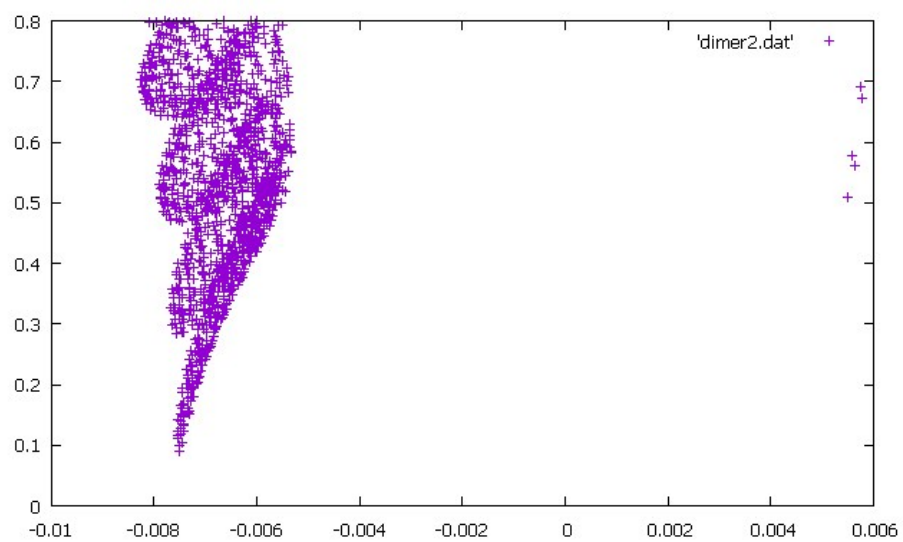

**Fig. S35I.** Intermolecular C11...C11 isosurface (top) and its corresponding RDG vs.  $\rho \cdot \text{sign}(\lambda_2)$  plot (down) in C8 (43ClFenReCl).

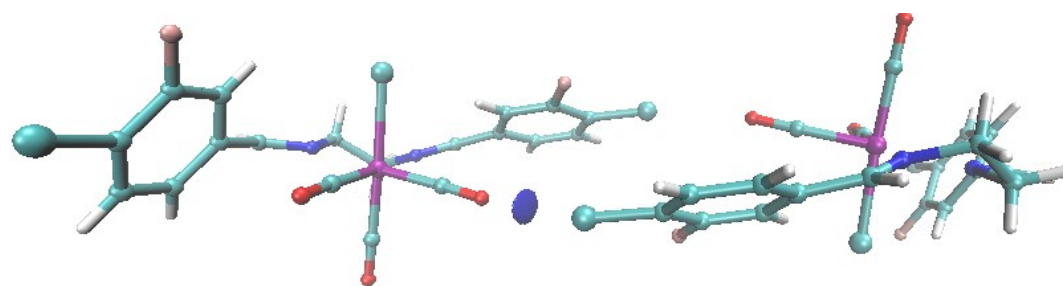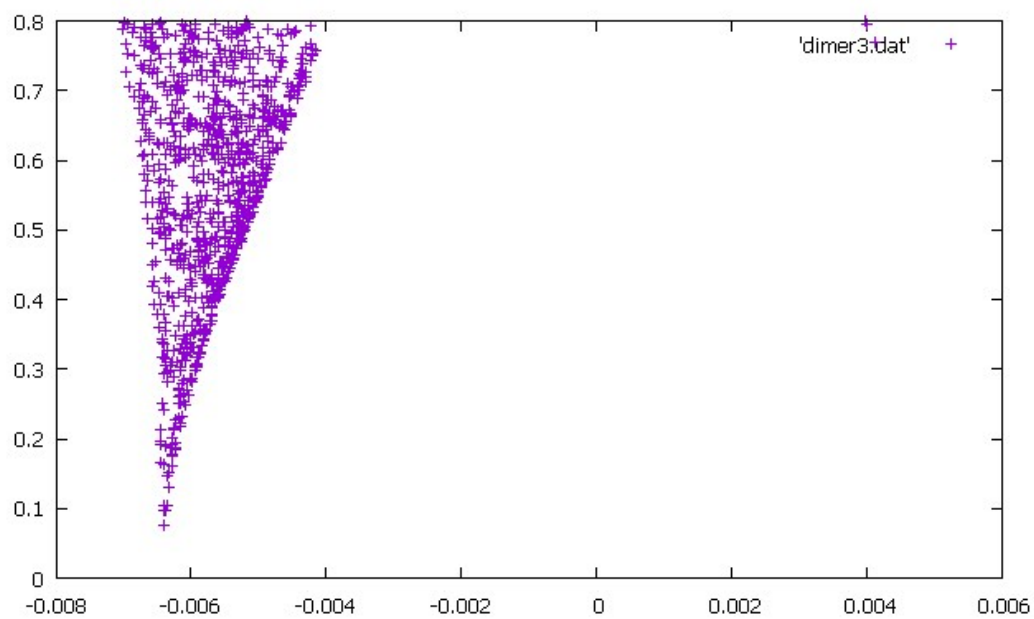

**Fig. S35m.** Intermolecular Cl2...O2 isosurface (top) and its corresponding RDG vs.  $\rho \cdot \text{sign}(\lambda_2)$  plot (down) in **C8 (43ClFenReCl)**.

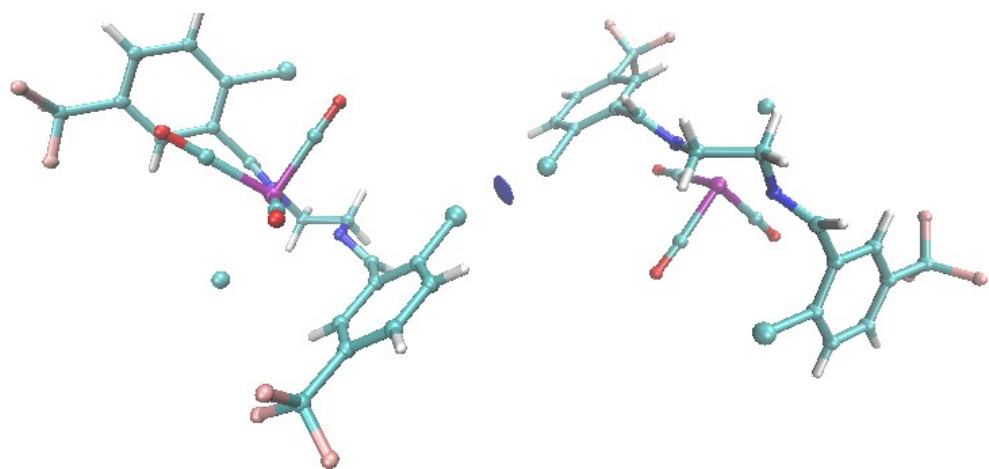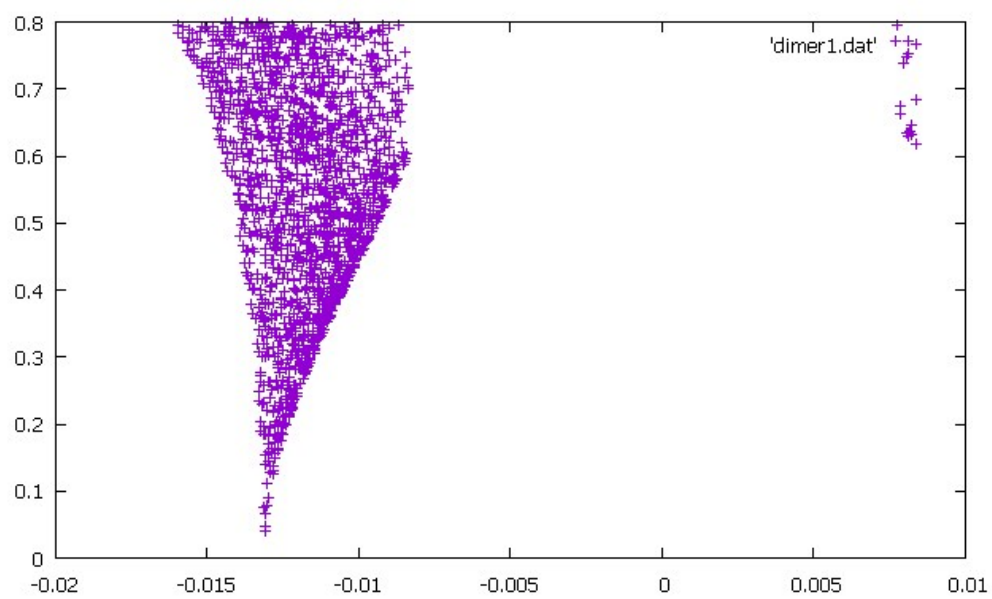

**Fig. S35n.** Intermolecular Cl1...Cl1 isosurface (top) and its corresponding RDG vs.  $\rho \cdot \text{sign}(\lambda_2)$  plot (down) in C9 (ClFenReBr).

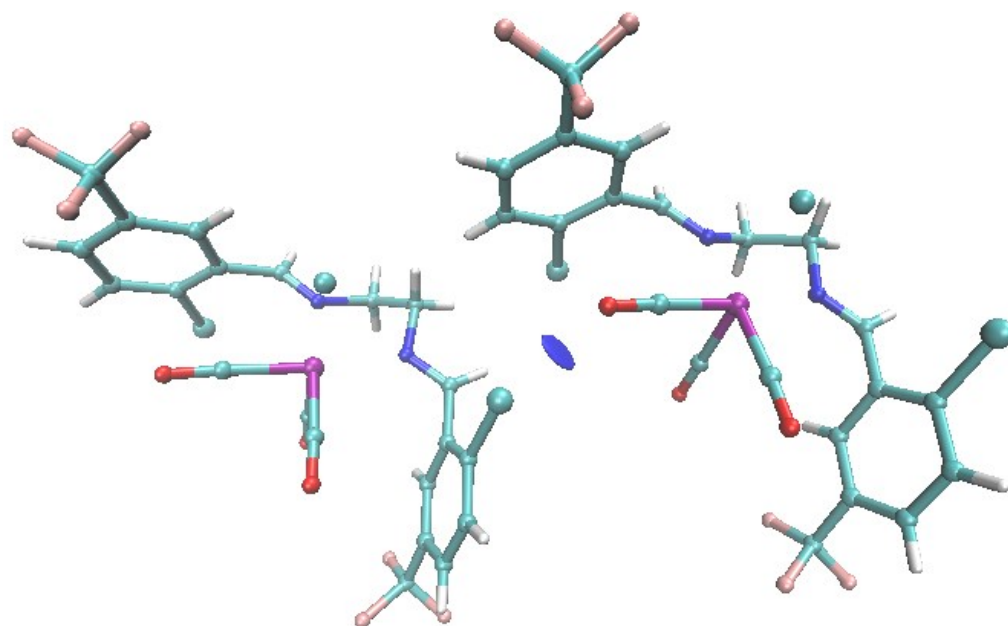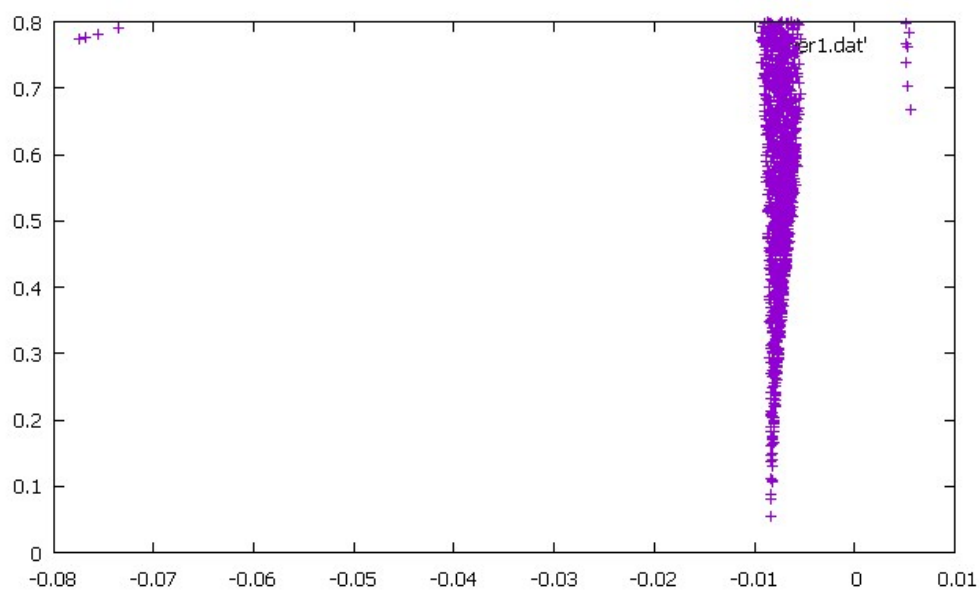

**Fig. S35o.** Intermolecular **Cl2...O2** isosurface (top) and its corresponding RDG vs.  $\rho \cdot \text{sign}(\lambda_2)$  plot (down) in **C10 (ClFenReBr')**.

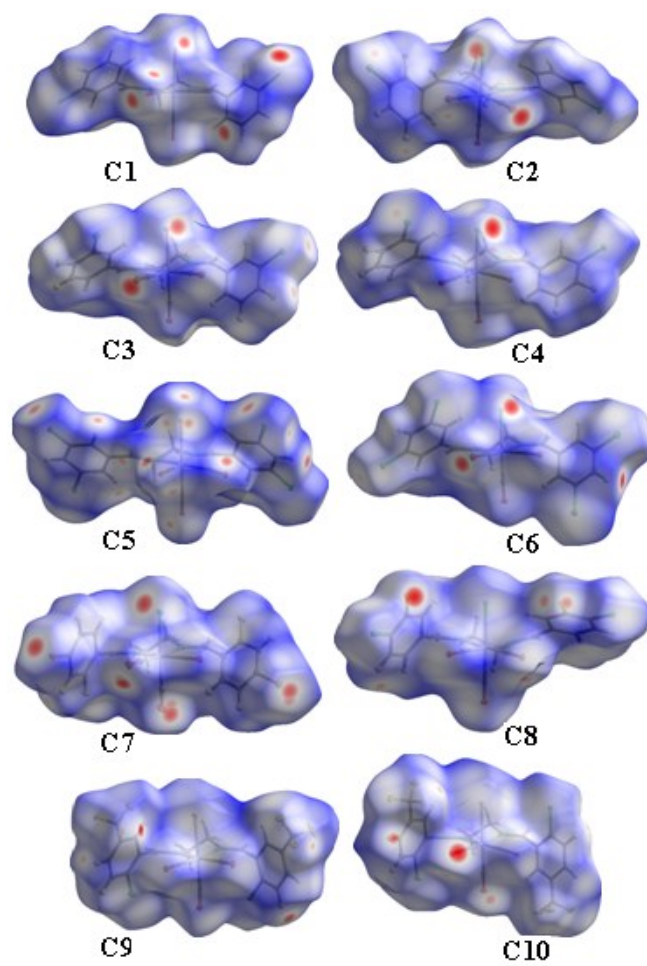

**Figure S36.**  $d_{\text{norm}}$  mapped on Hirshfeld surfaces in C1–C10.



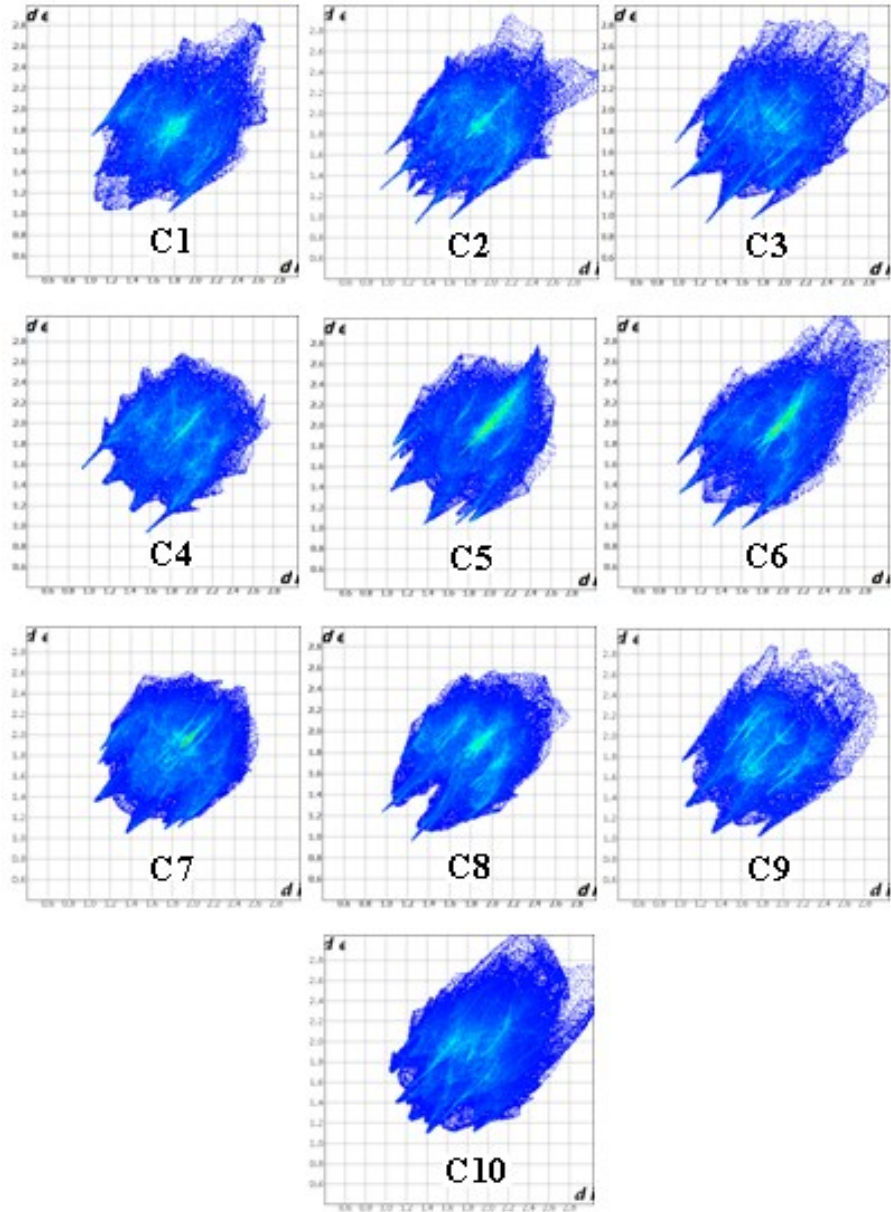

Figure S37. 2D fingerprint plots of observed contacts in C1-C10.
